# Supplementary material for: Procoagulant platelet sentinels prevent inflammatory bleeding through GPIIBIIIA and GPVI
Source: PubMed Central journal article supplement — Blood. 2022 Jul 14;140(2):121–39. doi: 10.1182/blood.2021014914 (PMC9283965; doi:10.1182/blood.2021014914), 2022-07-14

1 **Procoagulant platelet sentinels prevent inflammatory bleeding**  
2 **through GPIIB/IIIa and GPVI – Supplementary Information.**

3

4 Rainer Kaiser<sup>1,2\*</sup>, Raphael Escaig<sup>1,2</sup>, Jan Kranich<sup>3</sup>, Marie-Louise Hoffknecht<sup>1</sup>, Afra Anjum<sup>1,2</sup>,  
5 Vivien Polewka<sup>1</sup>, Magdalena Mader<sup>1,2</sup>, Wenbo Hu<sup>3</sup>, Larissa Belz<sup>1</sup>, Christoph Gold<sup>1,2</sup>, Anna  
6 Titova<sup>1</sup>, Michael Lorenz<sup>1</sup>, Stefan Kääh<sup>1,2</sup>, Kami Pekayvaz<sup>1,2</sup>, Florian Gaertner<sup>1,2</sup>, Konstantin  
7 Stark<sup>1,2</sup>, Thomas Brocker<sup>3</sup>, Steffen Massberg<sup>1,2</sup> and Leo Nicolai<sup>1,2\*</sup>

8

9 <sup>1</sup>Medizinische Klinik und Poliklinik I University Hospital Ludwig-Maximilian University, Munich, Germany

10 <sup>2</sup>DZHK (German Centre for Cardiovascular Research), partner site Munich Heart Alliance, Germany

11 <sup>3</sup>Institute for Immunology, Biomedical Center, Medical Faculty, Ludwig-Maximilian University Munich, 82152  
12 Planegg-Martinsried, Germany

13

14 \*Correspondence to rainer.kaiser@med.uni-muenchen.de and leo.nicolai@med.uni-muenchen.de, Medizinische  
15 Klinik und Poliklinik I, University Hospital Ludwig-Maximilian-University Munich, Marchioninstr. 15 81377, Munich,  
16 Germany.

17

18 **Table of contents**

- 19 – Suppl. Methods  
20 – Suppl. Tables 1+2  
21 – Suppl. Figures and Suppl. Figure captions S1-9  
22 – Suppl. Videos and Suppl. Video captions 1-3  
23 – Suppl. References

24

25

## 26 **Supplementary Methods**

### 27 Mouse strains

28 C57BL/6J (Stock No: 000664, labeled B16 or wild-type/WT), PF4cre<sup>1</sup> and CypD<sup>fl/fl</sup> (Ppif<sup>tm1Mmos</sup>/J,  
29 Stock No: 005737) mice were purchased from The Jackson Laboratory and maintained at our  
30 animal facility. The TMEM16F<sup>fl/fl</sup> line was provided by the RIKEN BioResource Center (BRC)  
31 through the National BioResource Project of the Ministry of Education, Culture, Sports,  
32 Science and Technology (MEXT)/Agency for Medical Research and Development (Japan)<sup>2,3</sup>.  
33 Arpc2<sup>fl/fl</sup> were gifts from Rong Li and the Wellcome Trust Sanger Institute, respectively. All  
34 strains used in this study were backcrossed to C57BL/6J background. Mice of both sexes were  
35 used for *in vitro* studies and tail bleeding assays. For acute lung injury, intraperitoneal sepsis  
36 and mesentery live imaging models, female mice were used, while male mice were used for  
37 the arterial thrombosis model. Unless otherwise stated, mice were 8 to 14 weeks of age when  
38 entering experiments.

39

### 40 Mouse anesthesia

41 Anesthesia was performed by intraperitoneal injection of medetomidine (0.5 mg/kg body  
42 weight), midazolam (5 mg/kg body weight) and fentanyl (0.05 mg/kg body weight, MMF) after  
43 initial induction with isoflurane. Anesthetized mice were kept on heating pads, where depth of  
44 anesthesia was monitored by toe pinching reflexes and breathing patterns. To maintain  
45 narcosis, repeated s.c. injections of 25-50% of the induction dose was applied.

46

### 47 Intraperitoneal sepsis model and evaluation of peritoneal bleeding

48 Mice were injected with 1 mg/kg BW LPS intraperitoneally and clinically scored for four to six  
49 hours. Subsequently, mice were sacrificed, and blood and organs were collected for flow  
50 cytometric and histopathological analysis. To assess the impact of thrombocytopenia and  
51 neutrophil depletion on peritoneal hemorrhage, mice were injected with a platelet-depleting  
52 antibody (R300, emfret, 100 µg per mouse) intravenously, a neutrophil-depleting antibody  
53 (UltraLeaf anti-Ly6G, Biolegend, 100 µg per mouse) intraperitoneally 12 hours prior to NaCl or  
54 LPS administration. Depletion efficiency was analyzed by flow cytometry and automated cell  
55 counting. For assessment of inflammatory bleeding in the peritoneal cavity, mice were  
56 sacrificed and 8 ml of PBS containing 5% BSA and 0.25 mM EDTA were instilled using a 26G  
57 needle after careful incision of the abdominal skin. A 20G needle was used to collect as much  
58 peritoneal lavage fluid as possible. Inflammatory bleeding and leukocyte infiltration were  
59 subsequently assessed by flow cytometry and immunofluorescence staining.

60

### 61 Tail bleeding assay

62 Mice were anesthetized as described above. Hereafter, 5 mm of the distal tail was resected  
63 using a precision scissor (MST) and the tail was immediately placed in 40 ml PBS (room  
64 temperature). Bleeding and re-bleeding times were recorded for 20 min. Bleeding was further  
65 quantified by using an automated cell counter to assess hemoglobin content.

66

#### 67 FeCl<sub>3</sub>-induced arterial thrombosis (A. carotis)

68 Ferric chloride-induced arterial thrombosis was performed as previously described<sup>4</sup>. In brief,  
69 male mice were anaesthetized and a DyLight 488-conjugated Gp1b antibody (X488, emfret,  
70 50 µl) was injected into the tail vein. Next, the right carotid artery was surgically exposed, and  
71 a small filter paper (0.5 mm<sup>2</sup>) saturated with FeCl<sub>3</sub> solution (10%, Sigma Aldrich) was placed  
72 touching the proximal end of the exposed carotid proportion. The filter paper was removed  
73 after 3 min and the forming thrombus was visualized using a fluorescence microscope  
74 (AxioScope, Carl Zeiss), with images taken every 10 sec. After 30 min, the carotid containing  
75 the thrombus was retrieved for histological analysis.

76

#### 77 GPVI depletion *in vivo*

78 For platelet-specific depletion and shedding of the collagen receptor GPVI, mice were injected  
79 with 100 µg of anti-GPVI antibody (clone JAQ1, emfret) i.p. Isotype-injected animals were used  
80 as controls. Subsequent experiments were initiated after 72 hours, when GPVI depletion  
81 remained sufficient and transient thrombocytopenia had resolved<sup>5</sup>. Efficacy of GPVI depletion  
82 was assessed by flow cytometric measurement of surface GPVI expression compared to  
83 isotype-treated animals as well as in platelet activation assays and flow cytometric  
84 measurement after stimulation with GPVI-specific agonist collagen and convulxin. Only  
85 animals with sufficient GPVI depletion were included in the respective experiments and  
86 analyses.

87

#### 88 Platelet and neutrophil depletion *in vivo*

89 To deplete platelets, Bl6 mice were injected with 100 µg of an anti-Gp1b antibody (R300,  
90 emfret) i.v. immediately before or 12 hours prior to performing acute lung injury and peritoneal  
91 inflammation experiments, respectively. A non-immunogenic antibody mix (C301, emfret) was  
92 used as isotype control. For neutrophil depletion, 100 µg of an anti-Ly6G antibody (UltraLeaf  
93 anti-Ly6G, clone 1A8, Biolegend) were injected i.p. 12 hours prior to induction of LPS-mediated  
94 peritoneal inflammation; an isotype (UltraLeaf rat anti-mouse IgG2a, Biolegend, 100 µg) was  
95 used as control. Depletion efficiency of both platelets and neutrophils was assessed by flow  
96 cytometry.

97

98 Antibodies and fluorescence-coupled proteins for flow cytometry and histopathology

99 Antibodies and other fluorescent proteins or peptides are listed in Suppl. Table 1. Antibodies  
100 were used 1:100 for flow cytometric analysis unless otherwise stated. Secondary antibodies  
101 used for histopathology and immunofluorescence stainings were used 1:200. For previously  
102 unused antibodies in our lab, isotype control stainings were performed to ensure staining  
103 specificity. In addition to using fluorescence-coupled annexin V, Ca<sup>2+</sup>-independent PS-staining  
104 reagent consisting of biotinylated C1 domains of murine lactadherin that have been  
105 multimerized using Streptavidin. These C1 multimers (C1) were used for the detection of  
106 procoagulant platelets *in vitro* and *in vivo* and are commercially available through Biolegend  
107 (see above) and have been described by our group<sup>6</sup>. For the detection of caspase 3/7  
108 activation in procoagulant platelets, the CellEvent kit (ThermoFisher, # C10423) was used  
109 (final concentration 20 µM). FITC: fluorescein isothiocyanate, PE: phycoerythrin, APC:  
110 allophycocyanin, AF: AlexaFluor, PB: pacific blue, BV: brilliant violet.

111

#### 112 Multiplex cytokine measurements

113 Cytokine levels of murine plasma and BAL fluid sampled shown in Suppl. Figure 1D were  
114 assessed using the LEGENDplex™ Mouse Inflammation Panel (13-plex (Biolegend, #740446)  
115 according to the manufacturer's instructions. Samples were measured on a BD LSRFortessa  
116 flow cytometer and resulting MFIs were analyzed using the LEGENDplex™ Data Analysis  
117 Software Suite to assess approximate cytokine concentrations.

118

#### 119 Human blood donors

120 Female and male volunteers aged 21 to 45 years served as donors for the isolation platelets,  
121 plasma samples or whole blood flow cytometry or thrombus formation experiments. All  
122 experiments involving human subjects are approved by a local ethical review board (LMU  
123 Munich), complying with any relevant regulation for experiments involving human samples.

124

#### 125 Human and mouse platelet isolation

126 Human blood was drawn by venipuncture of the cubital into syringes containing acid-citrate  
127 dextrose (39 mM citric acid, 75 mM sodium citrate, 135 mM dextrose; ACD, 1/7 volumes) and  
128 immediately diluted 1:1 with modified Tyrode's buffer (137 mM NaCl, 2.8 mM KCl, 12 mM  
129 NaHCO<sub>3</sub>, 5.5 mM sucrose, 10 mM HEPES, pH = 6.5). For mouse platelet isolation, all animals  
130 were anesthetized, and blood was subsequently collected by introduction of a glass capillary  
131 into the retroorbital vein plexus into 1/7 volumes of ACD followed by 1:1 dilution into Tyrode's  
132 buffer, pH 6.5. Both human and murine samples were subsequently centrifuged with 70g for  
133 35 or 15 min, respectively, to generate platelet-rich plasma (PRP). To isolate platelets, PRP  
134 was diluted 1:2 in modified Tyrode's buffer supplemented with PGI<sub>2</sub> (0.1 mg/ml) and either  
135 albumin (0.1%) or casein (0.01%), and subsequently centrifuged for 5-10 min at 1000g. After

136 resuspending the pellet in Tyrode's buffer, platelet counts were assessed using a Sysmex XN-  
137 V Series XN-1000V cell counter. Platelet-poor plasma (PPP) was generated by centrifugation  
138 of PRP for 5 min at 14,000g.

139

140 Inhibitors and agonists

141 Cyclosporin A (#30024), niflumic acid (#N0630), Ru360 (#557440), Synta66 (SML1949),  
142 Thrombin (#T4648), E. coli-derived LPS O111:B4 (#L2630), adenosin diphosphate (ADP,  
143 #01905) and mP6 (#5098840001) were purchased from Sigma and MerckMillipore. The PAR4  
144 inhibitor BMS-986120 was purchased from CaymanChem (#23497). All other inhibitors used  
145 and mentioned in Supplemental Data are described in detail by Nicolai et al.<sup>4</sup> The Syk inhibitor  
146 BI-1002494 and a control compound, BI-2492, were gifts from Boehringer Ingelheim. Clinical-  
147 grade tirofiban, enoxaparin and argatroban were purchased from ibigen, Sanofi-Aventis and  
148 Mitsubishi Pharma, respectively.

149

150 Chemicals

151 Horm collagen was purchased from Takeda (#1130630). Casein, human serum albumin,  
152 hexamethyldisilazane (HMDS), paraformaldehyde (PFA) and glutaraldehyde (GDA) were  
153 purchased from Sigma. Prostacycline (PGI<sub>2</sub>) was ordered from abcam. Unconjugated and  
154 AF546- or AF488-conjugated fibrinogen as well as the calcium-binding compound Fluo-4  
155 (#F14201) were acquired from ThermoFisher.

156

157 Migration and retraction assays

158 Isolated mouse and human platelets were diluted to a concentration of 150,000 – 200,000/μl.  
159  $4 \times 10^6$  platelets were subsequently activated by the addition of 4 μM ADP, 2 μM U46619 and  
160 1 mM calcium chloride, pipetted into pre-coated custom chambers and incubated for 15 min at  
161 37°C. Hereafter, non-adherent cells were removed by three washing steps with cell-free wash  
162 buffer containing 1 mM calcium chloride and antibodies and/or compounds for detection of  
163 platelets and respective activation markers. After 30-60 min, cells were fixated with fixation mix  
164 containing 2% PFA and 0.005% GDA. Samples were imaged using either an epifluorescence  
165 (Olympus IX83 microscope) or a Zeiss LSM 880 confocal microscope. Per biological replicate,  
166 5-6 random images were acquired. For live imaging of calcium oscillations, both murine and  
167 human isolated platelets were loaded with 1 μM Fluo-4 and allowed to seed for 15 min, washed  
168 three times and subsequently incubated for 10-15 minutes before imaging. Phase contrast,  
169 calcium oscillations and PS exposure were acquired every 10 seconds. In some instances,  
170 human PRP was loaded with 1 μM Fluo-4 for 20 min in the dark before centrifugation and  
171 isolation of washed platelets.

172

173 Live imaging of platelet migration, PS exposure and calcium signaling

174 Time-lapse video microscopy was performed using an inverted Olympus IX83 microscope with  
175 a 40x/1.0 or a 100x/1.4 oil-immersion objective and included recording of differential  
176 interference contrast (DIC), phase-contrast, and epifluorescence movies (5-20 s/frame). A pre-  
177 heated stage incubator (Tokai Hit) was used to mimic physiological conditions (humidified,  
178 37°C). For live-imaging of calcium oscillations, human or murine PRP was loaded with 1  $\mu$ M  
179 Fluo-4 (ThermoFisher) for 15 min at RT in the dark. Intensities of calcium oscillations and PS  
180 exposure were measured using Fiji ImageJ and quantified in a cell-based manner.

181

182 Thrombin turnover assay

183 Isolated mouse or human platelets were activated and left migrating on a  
184 collagen I/HSA/fibrinogen matrix as described above. After 15 min of migration, media were  
185 replaced by a solution containing PPP (20%) and a fluorescent thrombin substrate (13.3  $\mu$ M  
186 final concentration, SensoLyte® 520 Thrombin Activity Assay Kit, Anaspec, #AS-72129) as  
187 well as an antibody against CD41 or CD42b and the C1 multimer to distinguish procoagulant  
188 from non-procoagulant platelets. Thrombin turnover was assessed by confocal imaging (Zeiss  
189 LSM 880). Thrombin positivity and procoagulant activation were assessed for at least 100  
190 platelets from at least n = 2 individual mice and analyzed using Fiji ImageJ.

191

192 Pharmacological inhibition of platelet pathways and receptors

193 For testing of pathways involved in procoagulant activation of migrating and spreading  
194 platelets, inhibitors were added to the third and final washing step after platelets had adhered  
195 to the respective coating. Concentrations varied according to the compound used and are  
196 indicated in the respective figures and figure legends, with various concentrations being tested  
197 for all compounds (data not shown). In some cases (e. g. treatment with ciclosporine A),  
198 platelets were incubated with the respective compound or antibody for 15 min before being  
199 added to custom chambers. In case of dual receptor inhibition (e. g. GPIIBIIIA and GPVI),  
200 identical concentrations of individual compounds were used.

201

202 Platelet activation assay

203 Activation of platelets in suspension was performed as described previously<sup>4</sup>. In brief, isolated  
204 human or murine platelets suspended in modified Tyrode's buffer with 1 mM calcium chloride  
205 were incubated with fluorescent antibodies against platelet activation markers P-selectin,  
206 activated GPIIBIIIA and PS – among others – and activating agents targeting P2Y<sub>12</sub>, thrombin  
207 receptors PAR2/4 (thrombin), GPVI (convulxin, collagen) and the thromboxane receptor TXA<sub>2</sub>-  
208 R (U46119) for 30 min at RT or 37°C (concentrations indicated in the respective figures).  
209 Platelets were subsequently fixated with 1% PFA for 10 min in the dark, before being measured

210 on a BD LSRFortessa flow cytometer. Gating strategies are found in Suppl. Figure 9. Gating  
211 of subpopulations as well as MFI analyses were performed using FlowJo (v10).

212

### 213 Immunofluorescence staining

214 Platelets were fixated with fixation mix (PFA 2%, GDA 0.05%) for 10 min and subsequently  
215 stained using primary and secondary or primary-labelled antibodies in PBS containing 1% BSA  
216 for 1 h in the dark. In between primary and secondary antibodies as well as prior to imaging,  
217 platelets were washed three times with 1% BSA-containing PBS. Imaging was performed using  
218 a Zeiss LSM 880 confocal microscope in Airyscan mode (40/1.3 and 63/1.3 oil immersion  
219 objective).

220

### 221 Histopathological staining and analysis

222 For immunofluorescence and histopathological stainings, organs were first fixated in 4% PFA  
223 for 1 h at RT, dehydrated in 30% sucrose at 4°C overnight, cryoembedded and stored at either  
224 -80°C (long term storage) or -20°C (if processing was immediate). Organs were cut into 10 µm  
225 thick slices using a cryotome, fixated with 4% methylene-free PFA in PBS and subsequently  
226 permeabilized and blocked (10% goat serum, 0,5% saponin and 1% BSA in PBS). Samples  
227 were then stained using primary antibodies against TER119, Ly6G, CD42b, fibrinogen and  
228 phosphatidylserine as well as Hoechst dye to counterstain nuclei. Stained samples were  
229 imaged in Airyscan Super Resolution (SR) mode (20x/0.8 objective) on a Zeiss LSM 880  
230 confocal microscope at 0.6x magnification. Random areas were acquired by focusing on nuclei  
231 without prior assessment of either bleeding or neutrophil infiltration to ensure objective  
232 measurement. Neutrophil and platelet recruitment were assessed using a custom-made macro  
233 in Fiji ImageJ, which uses a neutrophil- or platelet-specific size range to identify individual cells.  
234 Pulmonary hemorrhage as defined by extravascular TER119-positive areas was measured  
235 after thresholding and exclusion of intravascular erythrocytes from the image.

236

### 237 Data collection and visualization

238 Data from *in vivo* and *in vitro* live imaging experiments were collected using Fiji ImageJ<sup>7</sup>. For  
239 4D *in vivo* timelapse microscopy, dimensions were reduced by maximum intensity projection.  
240 Assessment of motility patterns of platelets were defined as described by Nicolai *et al.*<sup>4</sup>.  
241 Migrating platelets from *in vitro* migration assays were tracked using the Fiji Manual tracking  
242 plugins, and were analyzed for directionality, velocity and acquired distance using the  
243 Chemotaxis Tool (ibidi) plugin. Shape analysis *in vitro* including platelet area, circularity and  
244 filopodia formation was performed described previously<sup>4</sup>. *In vivo*, motility patterns were defined  
245 as adherence, if platelets showed no distinguishable displacement over a duration of three  
246 acquired frames, leukocyte-dependent movement for platelets that showed movement while

247 in direct contact with CD45+ leukocytes and/or Ly6G+ neutrophils, respectively, and migration  
248 for movement of platelets along the vessel wall without contact to leukocytes and with  
249 displacement of at least one cell diameter during image acquisition. Procoagulant platelets  
250 were defined as CD42b-positive, balloon-like shapes that were platelet-like in size and stained  
251 positive for phosphatidylserine as assessed by Annexin V or mC1 multimer staining (see  
252 Figure 2B, C, Suppl. Figure 2A-E and Suppl. Video 1). Procoagulant platelets were counted  
253 as fibrinogen-positive if they exhibited an overlap between PS and fibrinogen channels (see  
254 Figure 2E, F, with yellow indicating channel overlap). In some cases, a line was manually  
255 drawn across a multi-channel image and MFIs of the respective fluorescence channels were  
256 analyzed and plotted using Fiji “plot profile” function. In *in vitro* migration assays that were  
257 imaged after fixation of cells, platelets were counted either in DIC/PH channels or a CD41  
258 fluorescence channel. Platelets were defined as “migrating”, if they had moved by at least one  
259 cell diameter as assessed by migration tracks in the fibrinogen channel. Procoagulant platelets  
260 were defined as having undergone morphological changes (ballooning, procoagulant  
261 spreading) and exposing PS as detected by Annexin V or C1 staining. In live imaging  
262 experiments, procoagulant platelets were considered positive for supramaximal calcium bursts  
263 if contact to collagen resulted in a calcium peak corresponding to at least 95% of the maximum  
264 fluorescence intensity. The cleared fibrinogen area, a surrogate for migration length, was  
265 analyzed by measuring the fibrinogen-negative area channel using Gaussian blur and  
266 thresholding in the fluorescent fibrinogen channel. Gaussian blurring, thresholding and area  
267 measurement were performed using a custom Fiji macro. For analysis of calcium oscillations  
268 of migrating platelets, measured Fluo-4 intensities and AnnV/C1 binding were normalized to  
269 1) background fluorescence and 2) to % of maximum intensity to allow for comparison of live  
270 imaging videos collected at different days. In flow cytometry experiments, counting beads were  
271 used to normalize cell counts in both blood and BALF samples to counts per microliter of the  
272 respective sample. Individual graphs were generated using Prism v9 (Graphpad) and figures  
273 were generated using Illustrator 2021 (Adobe). Experimental schemes and the graphical  
274 abstract were designed using BioRender ([www.biorender.com](http://www.biorender.com)).

275

## 276 Statistical analysis

277 Data were analyzed using Prism v9 (Graphpad), Excel v16 (Microsoft) and FlowJo v10 (BD)  
278 and are visualized as mean  $\pm$  standard deviation (SD); in selected graphs, data are depicted  
279 as SuperPlots<sup>8</sup>, with single dots representing the single data points measured per replicate  
280 and error bars representing the SD of the mean from biological replicates. Unless otherwise  
281 stated, all data shown include at least three biological replicates, with at least 5-6 randomly  
282 taken, individual images underlying each biological replicate data point for imaging studies.  
283 Representative images or flow cytometry plots were chosen according to the mean value



284 represented in the respective data set. We estimated animal sample sizes according to power  
285 calculations performed when ethical approval of planned experiments was applied for. All  
286 experimental groups were matched according to age and sex of the respective mouse lines.  
287 Statistical differences between experimental groups were assessed using t-tests and analyses  
288 of variance (ANOVA) as stated in the respective figure legends. In experiments with uneven  
289 sample sizes across groups (e. g. due to death of animals in one experimental group),  
290 normality distribution of acquired data was ensured using Shapiro-Wilk tests prior to further  
291 statistical testing. Unless otherwise stated, experiments including more than two groups were  
292 tested using one-way ANOVA with post-hoc Holm-Šídák's multiple comparisons test compared  
293 to control groups. If different experimental conditions were assessed on the same biological  
294 replicate, paired t-tests were used; in all other cases unpaired t-testing was performed. All t-  
295 tests were two-sided. Across all statistical tests, a p-value of <0.05 was considered statistically  
296 significant; p-values were marked by asterisks as follows: \* <0.05, \*\* <0.01, \*\*\* <0.005, \*\*\*\*  
297 <0.001, ns = non-significant. If no asterisks are indicated, there is no statistical difference  
298 between treatment groups.

299

300

301 **Supplementary Tables**

302

303 **Suppl. Table 1: Antibodies and fluorescent proteins**

| <b>Protein/epitope</b> | <b>Fluorophore</b> | <b>Target species</b> | <b>Manufacturer</b> | <b>Order #</b> |
|------------------------|--------------------|-----------------------|---------------------|----------------|
| act. CD42b (JonA)      | PE                 | mouse                 | emfret              | M023-2         |
| Annexin V              | FITC               | -                     | Biolegend           | 640906         |
| Annexin V              | AF649              | -                     | Biolegend           | 640912         |
| Anti-mouse IgG         | Cy3                | mouse                 | Invitrogen          | A10521         |
| Anti-rabbit IgG        | AF546              | rabbit                | Invitrogen          | A11037         |
| Anti-rabbit IgG        | AF649              | rabbit                | Invitrogen          | A21244         |
| Anti-rat IgG           | AF488              | rat                   | Invitrogen          | A21208         |
| Anti-rat IgG           | AF546              | rat                   | Invitrogen          | A11007         |
| C301                   | -                  | mouse                 | emfret              | C301           |
| CD107a                 | BV785              | mouse                 | Biolegend           | 328643         |
| CD11b                  | BV605              | human                 | Biolegend           | 101237         |
| CD144                  | AF649              | mouse                 | Biolegend           | 138006         |
| CD15                   | APC                | human                 | Biolegend           | 323008         |
| CD31                   | AF649              | mouse                 | Biolegend           | 102516         |
| CD36                   | PE                 | mouse                 | Biolegend           | 102605         |
| CD41                   | Pacific blue       | human                 | Biolegend           | 303714         |
| CD41                   | AF700              | mouse                 | Biolegend           | 133926         |
| CD42b                  | FITC               | mouse                 | emfret              | X488           |
| CD42b                  | DyeLight-649       | mouse                 | emfret              | X649           |
| CD42b                  | -                  | mouse                 | abcam               | ab183345       |
| CD44                   | AF700              | mouse                 | Biolegend           | 103026         |
| CD45                   | BV650              | human                 | Biolegend           | 304044         |
| CD45                   | PerCp-Cy5.5        | mouse                 | Biolegend           | 103132         |
| CD9                    | PE/Dazzle™ 594     | mouse                 | Biolegend           | 124821         |
| EpCAM                  | PE-Cy7             | mouse                 | Biolegend           | 118216         |
| Fibrinogen             | -                  | -                     | BioRad              | 4440-8004      |
| Fibrinogen             | AF546              | -                     | ThermoFisher        | F13192         |
| Fibrinogen             | AF488              | -                     | ThermoFisher        | F13191         |
| GPVI (JAQ1)            | FITC               | mouse                 | emfret              | M011-0         |
| Gr-1                   | AF488              | mouse                 | Biolegend           | 108417         |
| Hoechst Dye            | -                  | -                     | ThermoFisher        | H3570          |

|                     |                   |       |              |          |
|---------------------|-------------------|-------|--------------|----------|
| Hoechst Dye         | -                 | -     | ThermoFisher | H3570    |
| IgG2a (Ultra-LEAF™) | -                 | -     | Biolegend    | 400565   |
| Ly6G                | PE                | mouse | Biolegend    | 127608   |
| Ly6G                | PB                | mouse | Biolegend    | 127612   |
| Ly6G                | BV711             | mouse | Biolegend    | 127643   |
| Ly6G (Ultra-LEAF™)  | -                 | mouse | Biolegend    | 127649   |
| mC1 multimer        | Cy3               | -     | -            | TBD      |
| mC1 multimer        | AF649             | -     | -            | TBD      |
| PAC-1               | AF649             | human | Biolegend    | 362806   |
| P-selectin          | BV421             | human | Biolegend    | 304926   |
| P-selectin          | PE-Cy7            | mouse | Biolegend    | 148310   |
| P-selectin          | PE                | human | Biolegend    | 304905   |
| Phosphatidylserine  | -                 | -     | Merck        | 05-719   |
| R300                | -                 | mouse | emfret       | R300     |
| Streptavidin        | AF649             | -     | Biolegend    | 405237   |
| Streptavidin        | Cy3               | -     | Biolegend    | 405215   |
| TER119              | PE                | mouse | Biolegend    | 116208   |
| TER119              | AF488             | mouse | Biolegend    | 116215   |
| Thrombin            | 5-FAM/QXL™<br>520 | -     | Anaspec      | AS-72129 |

304

305

**Suppl. Table 2: Relative comparison of inflammatory bleeding severity**

| <b><u>Mouse line/inhibitor</u></b> | <b><u>Mean bleeding (% relative to LPS-treated control, ±SD)</u></b> |
|------------------------------------|----------------------------------------------------------------------|
| Platelet depletion (R300)          | <u>11093.89 ± 674.16</u>                                             |
| Argatroban (anti-FIIa)             | <u>160.76 ± 19.17</u>                                                |
| Rivaroxaban (anti-FXa)             | <u>146.69 ± 35.85</u>                                                |
| Enoxaparin (anti-FXa)              | <u>307.29 ± 70.21</u>                                                |
| PF4cre-CypD (Cre+)                 | <u>287.30 ± 59.29</u>                                                |
| PF4cre-TMEM16F (Cre+)              | <u>473.21 ± 81.99</u>                                                |
| JAQ1 (anti-GPVI)                   | <u>57.63 ± 22.19</u>                                                 |
| Tirofiban (anti-GPIIb/IIIa)        | <u>122.16 ± 42.24</u>                                                |
| JAQ1 + Tirofiban                   | <u>162.39 ± 9.02</u>                                                 |
|                                    |                                                                      |
| negative ctrl (NaCl i.n.)          | <u>5.90 ± 10.43</u>                                                  |

306

307

308 **Supplementary Figure legends**

309 **Suppl. Figure 1: Anticoagulation aggravates inflammatory bleeding.** | (A) Experimental  
310 scheme of subacute lung injury model, comparing intranasal LPS challenge (black arrow) with  
311 sham-treated animals. (B) Representative macroscopic image of BALF derived from  
312 experimental groups, collected in 2 ml Eppendorf tubes. (C) Flow-cytometric assessment of  
313 BALF RBC, neutrophil, platelet and platelet-neutrophil aggregate counts. n=4 animals per  
314 experimental group. Student's t-test, two-tailed, unpaired. (D) Quantification of cytokine  
315 measurements from plasma and BALF of sham- and LPS-treated animals collected 24 h hours  
316 after treatment. Two-way ANOVA with Holm-Šídák's multiple comparisons test. (E)  
317 Quantification of alveolar hemorrhage (TER119<sup>+</sup> area) and neutrophil recruitment in control  
318 (C301) and thrombocytopenic animals (R300) after LPS-induced lung injury, corresponding to  
319 Figure 1A-D. Student's t-test, two-tailed, unpaired. (F) Experimental scheme of subacute lung  
320 injury model with or without enoxaparin (ENOX)-mediated anticoagulation (s.c. injections of 10  
321 mg/kg BW enoxaparin 0 and 6 hours (red arrows) after LPS challenge (black arrow)). (G)  
322 Representative macroscopic image of BAL fluid derived from experimental groups, collected  
323 in 2 ml Eppendorf tubes. (H) Flow-cytometric assessment of BALF RBC and leukocyte counts.  
324 Student's t-test, two-tailed, unpaired. (I) Clinical scores of individual animals for 24 h after LPS  
325 challenge treated with Rivaroxaban, Argatroban or vehicle. Sepsis scores contain appearance,  
326 activity, responsiveness and breathing patterns. One-way ANOVA with post-hoc Holm-Šídák's  
327 multiple comparisons test. (J) Flow-cytometric assessment of peripheral blood platelet and  
328 leukocyte counts as well as procoagulant platelets and platelet-neutrophil aggregates (PNA)  
329 post-treatment. One-way ANOVA with post-hoc Holm-Šídák's multiple comparisons test. (K)  
330 Quantification of platelet recruitment and platelet-neutrophil aggregate (PNA) formation per  
331 mm<sup>2</sup> lung, referring to Figure 1J-O. (L) Representative micrographs from immunofluorescence  
332 stainings of lung slices from mice treated with vehicle or 10 mg/kg BW enoxaparin. Scale bar  
333 25 μm. (M) Quantification of alveolar hemorrhage (TER119<sup>+</sup> area), neutrophil and platelet  
334 recruitment. Student's t-test, two-tailed, unpaired. (N) Representative micrographs of migrating  
335 human platelets treated with vehicle, rivaroxaban (10 μg/ml) or argatroban (10 μg/ml). Scale  
336 bar 10 μm. (O) Quantification of % migrating platelets and the absolute cleared area per cell  
337 in μm<sup>2</sup> from n = 3 healthy individuals. One-way ANOVA with post-hoc Holm-Šídák's multiple  
338 comparisons test.

339

340 **Suppl. Figure 2: The C1 multimer detects procoagulant platelets *in vitro* and *in vivo*.** |

341 (A) Representative micrograph of migrating human platelets stained with  
342 antibodies/compounds against CD42b (white) and phosphatidylserine (C1, red, and Annexin  
343 V, green). Scale bar 10 μm. (B) Quantification of PS staining positivity by C1 and Annexin V,  
344 n = 3 individual donors. Student's t-test, paired, two-tailed. (C) Quantification of % procoagulant

345 platelets (detected by C1 multimer) and AnnV MFI of human platelets after stimulation with  
346 indicated agonists. One-way ANOVA with with post-hoc Holm-Šídák's multiple comparisons  
347 test, compared to Ctrl. (D) Correlation of C1 MFI with AnnV MFI and CD41 MFI of human  
348 platelets from the same experiment. P-value of linear regression analyses indicates  
349 significantly non-zero. (E) Representative scatter plots of human platelets from the same  
350 experiment to identify procoagulant platelets in response to thrombin/convulxin dual  
351 stimulation with C1 (left panels) and AnnV (right panels), respectively. (F) Experimental  
352 scheme and micrographs of 4D live microscopy of an inflamed mesenteric venule,  
353 corresponding to Suppl. Video 1. Dashed lines indicate the vessel wall. PS staining: mC1.  
354 Scale bar 5  $\mu\text{m}$ . (G) Representative micrograph and quantification of procoagulant platelet  
355 recruitment and overlap of fibrinogen/PS/platelet positive areas.  $n = 3-4$  animals corresponding  
356 to Figure 1G, H. PS staining: anti-PS antibody (Merck). Student's t-test, two-tailed, unpaired.  
357 (H) Experimental scheme of peritoneal inflammation model with or without depletion of  
358 platelets and/or neutrophils through antibody injection (red arrow) 12 hours prior to NaCl or  
359 LPS injection i.p. (black arrow). (I) Representative image of peritoneal lavage fluid for  
360 indicated, LPS-treated experimental groups, contained in 15 ml collection tubes. (J) Flow  
361 cytometry-based quantification of peripheral platelet and neutrophil counts to confirm cell-  
362 specific depletion. One-way ANOVA with post-hoc Holm-Šídák's multiple comparisons test,  
363 compared to LPS-treated Isotype control group. (K) Flow cytometry-based quantification of  
364 peritoneal lavage RBC and leukocyte counts as well as % of neutrophils among peritoneal  
365 leukocytes. One-way ANOVA with post-hoc Holm-Šídák's multiple comparisons test,  
366 compared to LPS-treated Isotype control group. (L) Quantification of TER119<sup>+</sup> area in  $\mu\text{m}^2$  and  
367 representative immunofluorescence images of mesenteric sections of thrombocytopenic mice  
368 i.p.-injected with NaCl (left panel) as well as LPS-challenged isotype- and R300-treated  
369 animals (center and right panels). White arrowheads indicate extravascular microbleeding.  
370 One-way ANOVA with post-hoc Holm-Šídák's multiple comparisons test, compared to LPS-  
371 treated Isotype control group. Scale bar 100  $\mu\text{m}$ . (M) Quantification and representative  
372 immunofluorescence imaging of intravascular fibrin(ogen) deposition in mesenteric vessels of  
373 LPS-challenged animals treated with isotype or anti-Ly6G antibody. Student's t-test, two-tailed,  
374 unpaired. Scale bar 25  $\mu\text{m}$ . (N) Representative micrograph of the mesenteric vasculature,  
375 corresponding to Figure 2J. Scale bar 20  $\mu\text{m}$ .

376  
377 **Suppl. Figure 3: Supporting data migration assay (I).** | (A) Representative images from  
378 migration assays of both Cre-positive and -negative murine platelets isolated from PF4cre-  
379 Arpc2<sup>fl/fl</sup> animals. White arrowheads indicate migrating platelets turning procoagulant. Scale  
380 bar 10. (B) Quantification of procoagulant activation from mouse platelets seeded on fibrinogen  
381 or collagen I mono-coatings. Student's t-test, unpaired, two-tailed. (C) Flow-cytometric

382 quantification of relative MFIs of P-selectin expression, GPIIBIIIA integrin activation and PS  
383 exposure (mC1) by both Cre-positive and -negative murine platelets isolated from PF4cre-  
384 *Arpc2<sup>fl/fl</sup>* animals after exposure to indicated agonists. Two-way ANOVA with post-hoc Holm-  
385 Šídák's multiple comparisons test, compared to PBS control group. (D) Representative scatter  
386 plots of flow cytometry experiments with isolated murine WT platelets incubated with PBS or  
387 collagen I; quantification of P-selectin-positive platelets and PS MFI (mC1) for platelets from  
388 n=4 mice. Student's t-test, unpaired, two-tailed. (E) Relative quantification of procoagulant  
389 platelet formation in the presence or absence of fibrinogen after stimulation with PBS, collagen  
390 I or convulxin and thrombin. Human platelets from n = 4 healthy donors. One-way ANOVA. (F)  
391 Relative quantification of fibrinogen-positive platelets and absolute quantification of mean  
392 fluorescence intensities (MFIs) of platelet-bound fibrinogen-AF488 after stimulation with PBS,  
393 collagen or convulxin and thrombin. Right panel: representative scatter plots. Human platelets  
394 from n = 4 healthy donors. One-way ANOVA with post-hoc Holm-Šídák's multiple comparisons  
395 test, compared to PBS control group. (G) Relative quantification of procoagulant platelet  
396 activation and cleared area from n=3 migration assays with human platelets incubated with  
397 PBS or a combination of Cangrelor (0.25  $\mu$ M), Terutroban (1  $\mu$ g/ml), and Vorapaxar (1  $\mu$ M).  
398 Student's t-test, unpaired, two-tailed. (H) Quantification of procoagulant platelet activation and  
399 cleared area from n=4 migration assays with human platelets incubated with PBS, PAR1  
400 inhibitor Vorapaxar (1  $\mu$ M), PAR4 inhibitor BMS-986120 (1  $\mu$ M) or a combination of both  
401 inhibitors. One-way ANOVA with post-hoc Holm-Šídák's multiple comparisons test, compared  
402 to PBS control group. (I, J) Representative micrographs of migrating human platelets on a  
403 hybrid matrix. Red (anti-Fbg antibody, anti-Sheep secondary antibody coupled to AF649)  
404 indicates all fibrin(ogen), including endogenous (platelet-inherent) and exogenous (Fbg-  
405 AF488, used for coating) fibrin(ogen); yellow indicates overlap of both channels. The  
406 arrowhead indicates overlap of both stainings, the white star indicates red-only and thus  
407 endogenous fibrin(ogen) deposition next to a procoagulant platelet. PS-detecting agent: C1-  
408 Cy3. Scale bars 20  $\mu$ m (I), 2  $\mu$ m (J).

409  
410 **Suppl. Figure 4: Validation of PF4cre-CypD<sup>fl/fl</sup> and PF4cre-TMEM16F<sup>fl/fl</sup> mouse lines.** | (A)  
411 Baseline quantification of body weight and peripheral platelet, RBC and leukocyte counts of  
412 PF4cre-CypD<sup>fl/fl</sup> mice, n=4 per Cre-positive/-negative animals. Student's t-test, unpaired, two-  
413 tailed. (B) Flow-cytometric analysis of baseline expression of several platelet receptors from  
414 isolated platelets. n=4 per Cre-positive/-negative animals of the PF4cre-CypD<sup>fl/fl</sup> mouse line.  
415 Two-way ANOVA. (C) Flow-cytometric quantification of absolute MFIs of P-selectin  
416 expression, GPIIBIIIA integrin activation and PS exposure (stained by C1) by both Cre-positive  
417 and -negative murine platelets isolated from PF4cre-CypD<sup>fl/fl</sup> animals after exposure to  
418 indicated agonists. n=4. Two-way ANOVA. (D) Baseline quantification of body weight and

419 peripheral platelet, RBC and leukocyte counts of PF4cre-TMEM16F<sup>fl/fl</sup> mice, n=3-4 per Cre-  
420 positive/-negative animals. Student's t-test, unpaired, two-tailed. (E) Flow-cytometric analysis  
421 of baseline expression of several platelet receptors from isolated platelets. n=4 per Cre-  
422 positive/-negative animals from PF4cre-TMEM16F<sup>fl/fl</sup> mice. Two-way ANOVA. (F) Flow-  
423 cytometric quantification of absolute MFIs of P-selectin expression and PS exposure (stained  
424 by C1) by both Cre-positive and -negative murine platelets isolated from PF4cre-TMEM16F<sup>fl/fl</sup>  
425 animals after exposure to indicated agonists. n=3-4. Two-way ANOVA. (G) Quantification of  
426 total bleeding time and time to first hemostasis of Cre-positive and -negative PF4cre-CypD<sup>fl/fl</sup>  
427 mice. n = 5-7 per group. Student's t-test, unpaired, two-tailed. (H) Quantification of total  
428 bleeding time and time to first hemostasis of Cre-positive and -negative PF4cre-TMEM16F<sup>fl/fl</sup>  
429 mice. n = 4-8 per group. Student's t-test, unpaired, two-tailed. (I) Analysis of arterial thrombosis  
430 experiments with PF4cre-CypD<sup>fl/fl</sup> mice (n = 7 for both Cre- and Cre+ mice) with quantification  
431 of time to first occlusion, % of vessel occlusion, maximum thrombus size as well as longitudinal  
432 assessment of % of occlusion-free vessels over time. (J) Representative images of carotid  
433 arteries from Cre+ and Cre- PF4cre-CypD<sup>fl/fl</sup> mice after 3 min of FeCl<sub>3</sub>-induced injury at  
434 maximum thrombus size. Dashed lines represent vessel walls. Scale bar = 500 μm. (K)  
435 Analysis of arterial thrombosis experiments with PF4cre-TMEM16F<sup>fl/fl</sup> mice (n = 4-5 for both  
436 Cre- and Cre+ mice) with quantification of time to first occlusion, % of vessel occlusion,  
437 maximum thrombus size as well as longitudinal assessment of % of occlusion-free vessels  
438 over time. (L) Representative images of carotid arteries from Cre+ and Cre- PF4cre-  
439 TMEM16F<sup>fl/fl</sup> mice after 3 min of FeCl<sub>3</sub>-induced injury at maximum thrombus size. Dashed lines  
440 represent vessel walls. Scale bar = 500 μm. (M) Representative micrographs of procoagulant  
441 activation of Cre-negative (left panels) and Cre-positive murine platelets (right panels) of  
442 PF4cre-TMEM16F<sup>fl/fl</sup> animals. PS staining: mC1. Scale bars 5 μm. (N) Cell-based  
443 quantification of the number of filopodia, number of released microvesicles and MFI of PS  
444 exposure of Cre-positive and -negative platelets isolated from PF4cre-TMEM16F<sup>fl/fl</sup> animals.  
445 Student's t-test, unpaired, two-tailed. (O) Representative micrograph of migrating and  
446 procoagulant mouse platelets that were co-stained for caspase activation using CellEvent™  
447 Caspase-3/7 detection dye, showing caspase activation (red) in some procoagulant platelets.  
448 White arrowhead indicates a procoagulant, caspase-positive platelets, stars indicate migrating,  
449 caspase-negative platelets. Note that most procoagulant platelets are caspase-negative.  
450 Scale bar 20 μm. (P) Quantification of migrating and procoagulant mouse platelets for co-  
451 staining of PS (C1) and caspase activation. FOV-based quantification including 435 cells. One-  
452 way ANOVA with post-hoc Holm-Šídák's multiple comparisons test. (Q) Quantification of  
453 procoagulant activation and migratory capacity of platelets isolated from n = 3 WT mice with  
454 or without treatment with the pan-caspase inhibitor Q-VD-OPh (QVD, 50 μM). Student's t-test,  
455 unpaired, two-tailed. (R) Representative micrographs of migrating or procoagulant platelets:

456 migrating platelet from PF4cre mouse (Cre-positive, left panel), procoagulant platelet from  
457 PF4cre mouse (Cre-positive, center panel) and procoagulant platelet from PF4cre-  
458 TMEM16F<sup>fl/fl</sup> mouse (Cre-positive, left panel). PS staining: mC1. Scale bars 5  $\mu$ m.

459

460 **Suppl. Figure 5: Supporting data CypD/TMEM16F ALI experiments.** | (A) BAL fluid  
461 neutrophil and platelet-neutrophil aggregate counts of PF4cre-CypD<sup>fl/fl</sup> animals 24 h after LPS  
462 challenge. Student's t-test, unpaired, two-tailed. (B) Peripheral platelet and leukocyte counts  
463 of PF4cre-CypD<sup>fl/fl</sup> animals 24 h after LPS challenge. Student's t-test, unpaired, two-tailed. (C)  
464 BAL fluid neutrophil and platelet-neutrophil aggregate counts of PF4cre-TMEM16F<sup>fl/fl</sup> animals  
465 24 h after LPS challenge. Student's t-test, unpaired, two-tailed. (D) Peripheral platelet and  
466 leukocyte counts of PF4cre-TMEM16F<sup>fl/fl</sup> animals 24 h after LPS challenge. n = 4 animals per  
467 group. Student's t-test, unpaired, two-tailed.

468

469 **Suppl. Figure 6: Supporting data mechanosensing and calcium imaging.** | (A)  
470 Representative micrographs of isolated human platelets migrating on a fibrinogen/albumin  
471 matrix. Right panel: Representative calcium oscillations of migrating platelets. (B) Relative  
472 quantification of percentage of platelet procoagulant activation of all collagen-associated cells.  
473 Individual dots represent percentages derived from individual time-lapse microscopy videos.  
474 Platelets were isolated from n=2-3 mice per group. One-way ANOVA with post-hoc Holm-  
475 Šídák's multiple comparisons test. (C) Representative calcium (Fluo-4, green) and PS (mC1,  
476 pink) intensity profiles derived from live imaging of platelets from TMEM16F-deficient platelets.  
477 Arrows indicate the beginning of procoagulant activation after sensing collagen fibers, numbers  
478 indicate the time to supramaximal calcium plateau in seconds. (D) Quantification of time to  
479 calcium plateau for procoagulant platelets isolated from mice with indicated genotypes. n = 25  
480 individual procoagulant platelets. One-way ANOVA with post-hoc Holm-Šídák's multiple  
481 comparisons test. (E) Representative micrographs of isolated platelets from CypD-deficient  
482 mice migrating on a fibrinogen/albumin/collagen I matrix, corresponding to Figure 6E. Scale  
483 bar 10  $\mu$ m. (F) Quantification of procoagulant platelet activation and cleared area (as a proxy  
484 of migratory capacity) of human platelets treated with Synta66 (50  $\mu$ M), Ru360 (50  $\mu$ M) and  
485 BI-74932 (50  $\mu$ M) to inhibit store-operated calcium entry (SOCE), mitochondrial calcium  
486 uniport and extracellular calcium influx, respectively. n = 3 healthy human donors. (G) Relative  
487 quantification of procoagulant platelet activation and cleared area per cell for human platelets  
488 (n=7) incubated with all the above calcium inhibitors (Synta66, Ru360 and BI-74932),  
489 normalized to untreated control platelets. Student's t-test, unpaired, two-tailed.

490

491 **Suppl. Figure 7: Supporting data migration assay (II).** | (A, B) Representative micrographs  
492 and quantification of migrating human platelets (n=3) on a hybrid collagen matrix with co-



493 staining of activated GPIIBIIIA by PAC-1 antibody. Arrowhead indicates migrating platelet with  
494 PAC-1 binding to the fibrin(ogen)-rich platelet's pseudonucleus. Note that only few  
495 procoagulant platelets bind PAC-1. Scale bar 20  $\mu\text{m}$ . Student's t-test, unpaired, two-tailed. (C,  
496 D) Relative quantification of procoagulant platelets and cleared area from migration assays  
497 performed with human platelets from n = 3 healthy donors. Final concentrations for  $\text{Ca}^{2+}$  were  
498 1 mM, unless calcium was depleted or not added to the assay. Inhibitor concentrations: PP2  
499 20  $\mu\text{M}$ , NSC27633 5  $\mu\text{M}$ , U73122 10  $\mu\text{M}$ , ML7 50  $\mu\text{M}$ , Blebbistatin 1  $\mu\text{M}$ . One-way ANOVA  
500 with post-hoc Holm-Šídák's multiple comparisons test compared to Ctrl group. (E)  
501 Representative micrographs of human platelets treated with the respective agonists/inhibitors,  
502 with the yellow outline indicative of the manual tracking of cell shape. Scale bar 3  $\mu\text{m}$ . (F)  
503 Analysis of area, circularity and number of filopodia per platelet for n > 30 platelets per  
504 condition. One-way ANOVA with post-hoc Holm-Šídák's multiple comparisons test compared  
505 to control group. (G) Quantification of % migrating platelets and cleared area/platelet by murine  
506 platelets treated or not with 20  $\mu\text{M}$  mP6. Student's t-test, unpaired, two-tailed. (H)  
507 Quantification of migrating platelets and cleared area/platelet by murine platelets treated or  
508 not with ascending concentrations of anti-GPVI antibody JAQ1. One-way ANOVA with post-  
509 hoc Holm-Šídák's multiple comparisons test compared to control group. (I) Quantification of  
510 migrating platelets and cleared area/platelet by murine platelets treated or not with ascending  
511 concentrations of Syk inhibitor BI-1002494. One-way ANOVA with post-hoc Holm-Šídák's  
512 multiple comparisons test compared to control group. (J) Quantification of migrating platelets,  
513 procoagulant activation and cleared area from migration assays with platelets from n = 3  
514 human donors treated or not with the  $\alpha 2\beta 1$  receptor inhibitor TC-I15 (10  $\mu\text{M}$ ). (K)  
515 Fluorescence microscopy image of migrating platelets, t = 16 min, corresponding to Figure 7D  
516 und Suppl. Video 3. PS staining: mC1. Scale bar = 10  $\mu\text{m}$ . (L) Relative quantification of calcium  
517 amplitude of migrating platelets treated with vehicle, mP6 (20  $\mu\text{M}$ ) or BI-1002494 (2.5  $\mu\text{M}$ ).  
518 n=5-6 videos from n=2-3 mice per condition with a total of > 100 platelets were analyzed.

519  
520 **Suppl. Figure 8: Supporting *in vivo* and *in vitro* data for GPIIBIIIA and GPVI blockade. |**  
521 (A) Representative confocal images of mouse platelets treated with isotype control and vehicle  
522 or JAQ1 (10  $\mu\text{g}/\text{ml}$ ) and tirofiban (1  $\mu\text{g}/\text{ml}$ ). PS staining: mC1. Scale bar = 10  $\mu\text{m}$ . (B)  
523 Quantification of procoagulant platelet activation, migrating platelets and cleared area per  
524 platelet for indicated treatments. One-way ANOVA. (C) Representative scatter plots from flow  
525 cytometric measurements of isolated platelets from mice treated with the GPVI-blocking  
526 antibody JAQ1 or IgG2a isotype control (100 mg per animal injected i.p. 72 hours prior to  
527 platelet isolation). (D) MFIs for GPVI measured in platelets isolated from JAQ1- or IgG2a-  
528 treated Bl6 mice. Student's t-test, unpaired, two-tailed. (E) MFIs for PS (C1), P-selectin and  
529 activated GPIIBIIIA (JonA) after pre-incubation of human platelets with PBS or the GPIIBIIIA

530 antagonist tirofiban (1 µg/ml) and subsequent treatment with PBS or convulxin. One-way  
531 ANOVA. (F) Representative scatter plots from flow cytometric measurements of isolated  
532 human platelets after pre-treatment mit PBS or tirofiban and subsequent activation with  
533 convulxin. (G) Analysis of migrating platelets, procoagulant activation and cleared area of  
534 human platelets from n = 4 healthy human donors with or without tirofiban treatment (1 µg/ml).  
535 (H) Clinical scores of individual animals across treatment groups for 24 h after LPS challenge.  
536 Sepsis scores contain appearance, activity, responsiveness and breathing patterns. One-way  
537 ANOVA. (I) MFIs of several platelet receptors measured in whole blood of animals from  
538 treatment groups 24 h after LPS challenge. (J) MFI of GPVI in whole blood of mice from  
539 treatment groups 24 h after LPS challenge. One-way ANOVA. (K) Quantification of PNA  
540 formation in BAL fluid across treatment groups. One-way ANOVA. (L) Experimental scheme  
541 for peritoneal sepsis in Bl6 mice treated with JAQ1, a GPVI-blocking antibody, or isotype (red  
542 arrow) 72 hours prior to LPS challenge (black arrow) and vehicle or Tirofiban injections at 0  
543 and 3 hours (red arrows) after LPS challenge. (M) Quantification of platelet GPVI expression,  
544 % procoagulant platelets and CD41 expression in whole blood across experimental groups  
545 (n=4). Student's t-test, two-tailed, unpaired. (N) Quantification of RBC and WBC counts as well  
546 as PNA formation in peritoneal lavage fluid (n=4). Student's t-test, two-tailed, unpaired. (O)  
547 Representative immunofluorescence stainings from mesenteric sections of control and  
548 JAQ1/tirofiban-treated animals, showing procoagulant (white arrowhead) and PS-negative  
549 platelets (white star) adherent to CD31-positive endothelium. Scale bar = 10 µm. (P)  
550 Quantification of platelet recruitment (number of all adherent vascular platelets) and %  
551 procoagulant platelets in mesenteric vessels of isotype/vehicle or JAQ1/tirofiban-treated  
552 animals after LPS administration (n=4). Student's t-test, two-tailed, unpaired. (Q)  
553 Representative immunofluorescence stainings from mesenteric sections of control and  
554 JAQ1/tirofiban-treated animals, revealing mesenteric microbleeding in dual blockade of GPVI  
555 and GPIIBIIIA (white arrowhead). Scale bar 50 µm. (R) Quantification of mesenteric  
556 microbleeding as assessed by extravascular RBC count per mm<sup>2</sup> mesentery. Student's t-test,  
557 two-tailed, unpaired. Holm-Šídák's multiple comparisons tests compared to control group were  
558 used for all one-way ANOVAs in this figure.

559

560 **Suppl. Figure 9: Gating strategies for whole blood and BAL fluid.** | (A) Representative  
561 scatter plots from whole blood with gating strategies for the identification of platelets,  
562 procoagulant platelets, leukocytes, neutrophils and neutrophil-platelet aggregates. MFIs were  
563 measured after gating for the respective population. (B, C) Representative scatter plots from  
564 BAL fluid with gating strategies for the identification of leukocytes, neutrophils and red blood  
565 cells. Peritoneal lavage samples (not shown) were gated according to the strategy shown in  
566 C.

567 **Supplementary Video legends**

568 **Suppl. Video 1: Platelet procoagulant activation *in vivo*.** 4D live microscopy of a mesentery  
569 venule. White: platelets, fire: PS exposure (mC1). Dotted lines indicate the vessel wall. Scale  
570 bar 10  $\mu\text{m}$ .

571  
572 **Suppl. Video 2: Supramaximal calcium bursts prior to platelet ballooning and PS**  
573 **exposure of migrating platelets.** Live microscopy of migrating human platelets on a hybrid  
574 albumin/fibrinogen/collagen I matrix. Phase contrast. Green: Fluo-4 (intracellular calcium  
575 oscillations), fire: PS exposure (AnnV). Scale bar 10  $\mu\text{m}$ .

576  
577 **Suppl. Video 3: Calcium oscillations in migrating platelet pre-treated with mP6.** Live  
578 microscopy of migrating human platelets on a hybrid albumin/fibrinogen/collagen I matrix.  
579 Phase contrast. Green: Fluo-4 (intracellular calcium oscillations), fire: PS exposure (mC1).  
580 Scale bar 10  $\mu\text{m}$ .

581

582

583 **Suppl. References**

584

- 585 1. Tiedt R, Schomber T, Hao-Shen H, Skoda RC. Pf4-Cre transgenic mice allow the generation of  
586 lineage-restricted gene knockouts for studying megakaryocyte and platelet function in vivo. *Blood*.  
587 2007;109(4):1503-1506.
- 588 2. Suzuki J, Fujii T, Imao T, Ishihara K, Kuba H, Nagata S. Calcium-dependent phospholipid  
589 scramblase activity of TMEM16 protein family members. *J Biol Chem*. 2013;288(19):13305-13316.
- 590 3. Fujii T, Sakata A, Nishimura S, Eto K, Nagata S. TMEM16F is required for phosphatidylserine  
591 exposure and microparticle release in activated mouse platelets. *Proc Natl Acad Sci U S A*.  
592 2015;112(41):12800-12805.
- 593 4. Nicolai L, Schiefelbein K, Lipsky S, et al. Vascular surveillance by haptotactic blood platelets in  
594 inflammation and infection. *Nat Commun*. 2020;11(1):5778.
- 595 5. Schulte V, Rabie T, Prostedna M, Aktas B, Gruner S, Nieswandt B. Targeting of the collagen-  
596 binding site on glycoprotein VI is not essential for in vivo depletion of the receptor. *Blood*.  
597 2003;101(10):3948-3952.
- 598 6. Rausch L, Lutz K, Schifferer M, et al. Binding of phosphatidylserine-positive microparticles by  
599 PBMCs classifies disease severity in COVID-19 patients. *J Extracell Vesicles*. 2021;10(14):e12173.
- 600 7. Schindelin J, Arganda-Carreras I, Frise E, et al. Fiji: an open-source platform for biological-  
601 image analysis. *Nat Methods*. 2012;9(7):676-682.
- 602 8. Lord SJ, Velle KB, Mullins RD, Fritz-Laylin LK. SuperPlots: Communicating reproducibility and  
603 variability in cell biology. *J Cell Biol*. 2020;219(6).
- 604

Suppl. Figure 1: Anticoagulation aggravates inflammatory bleeding

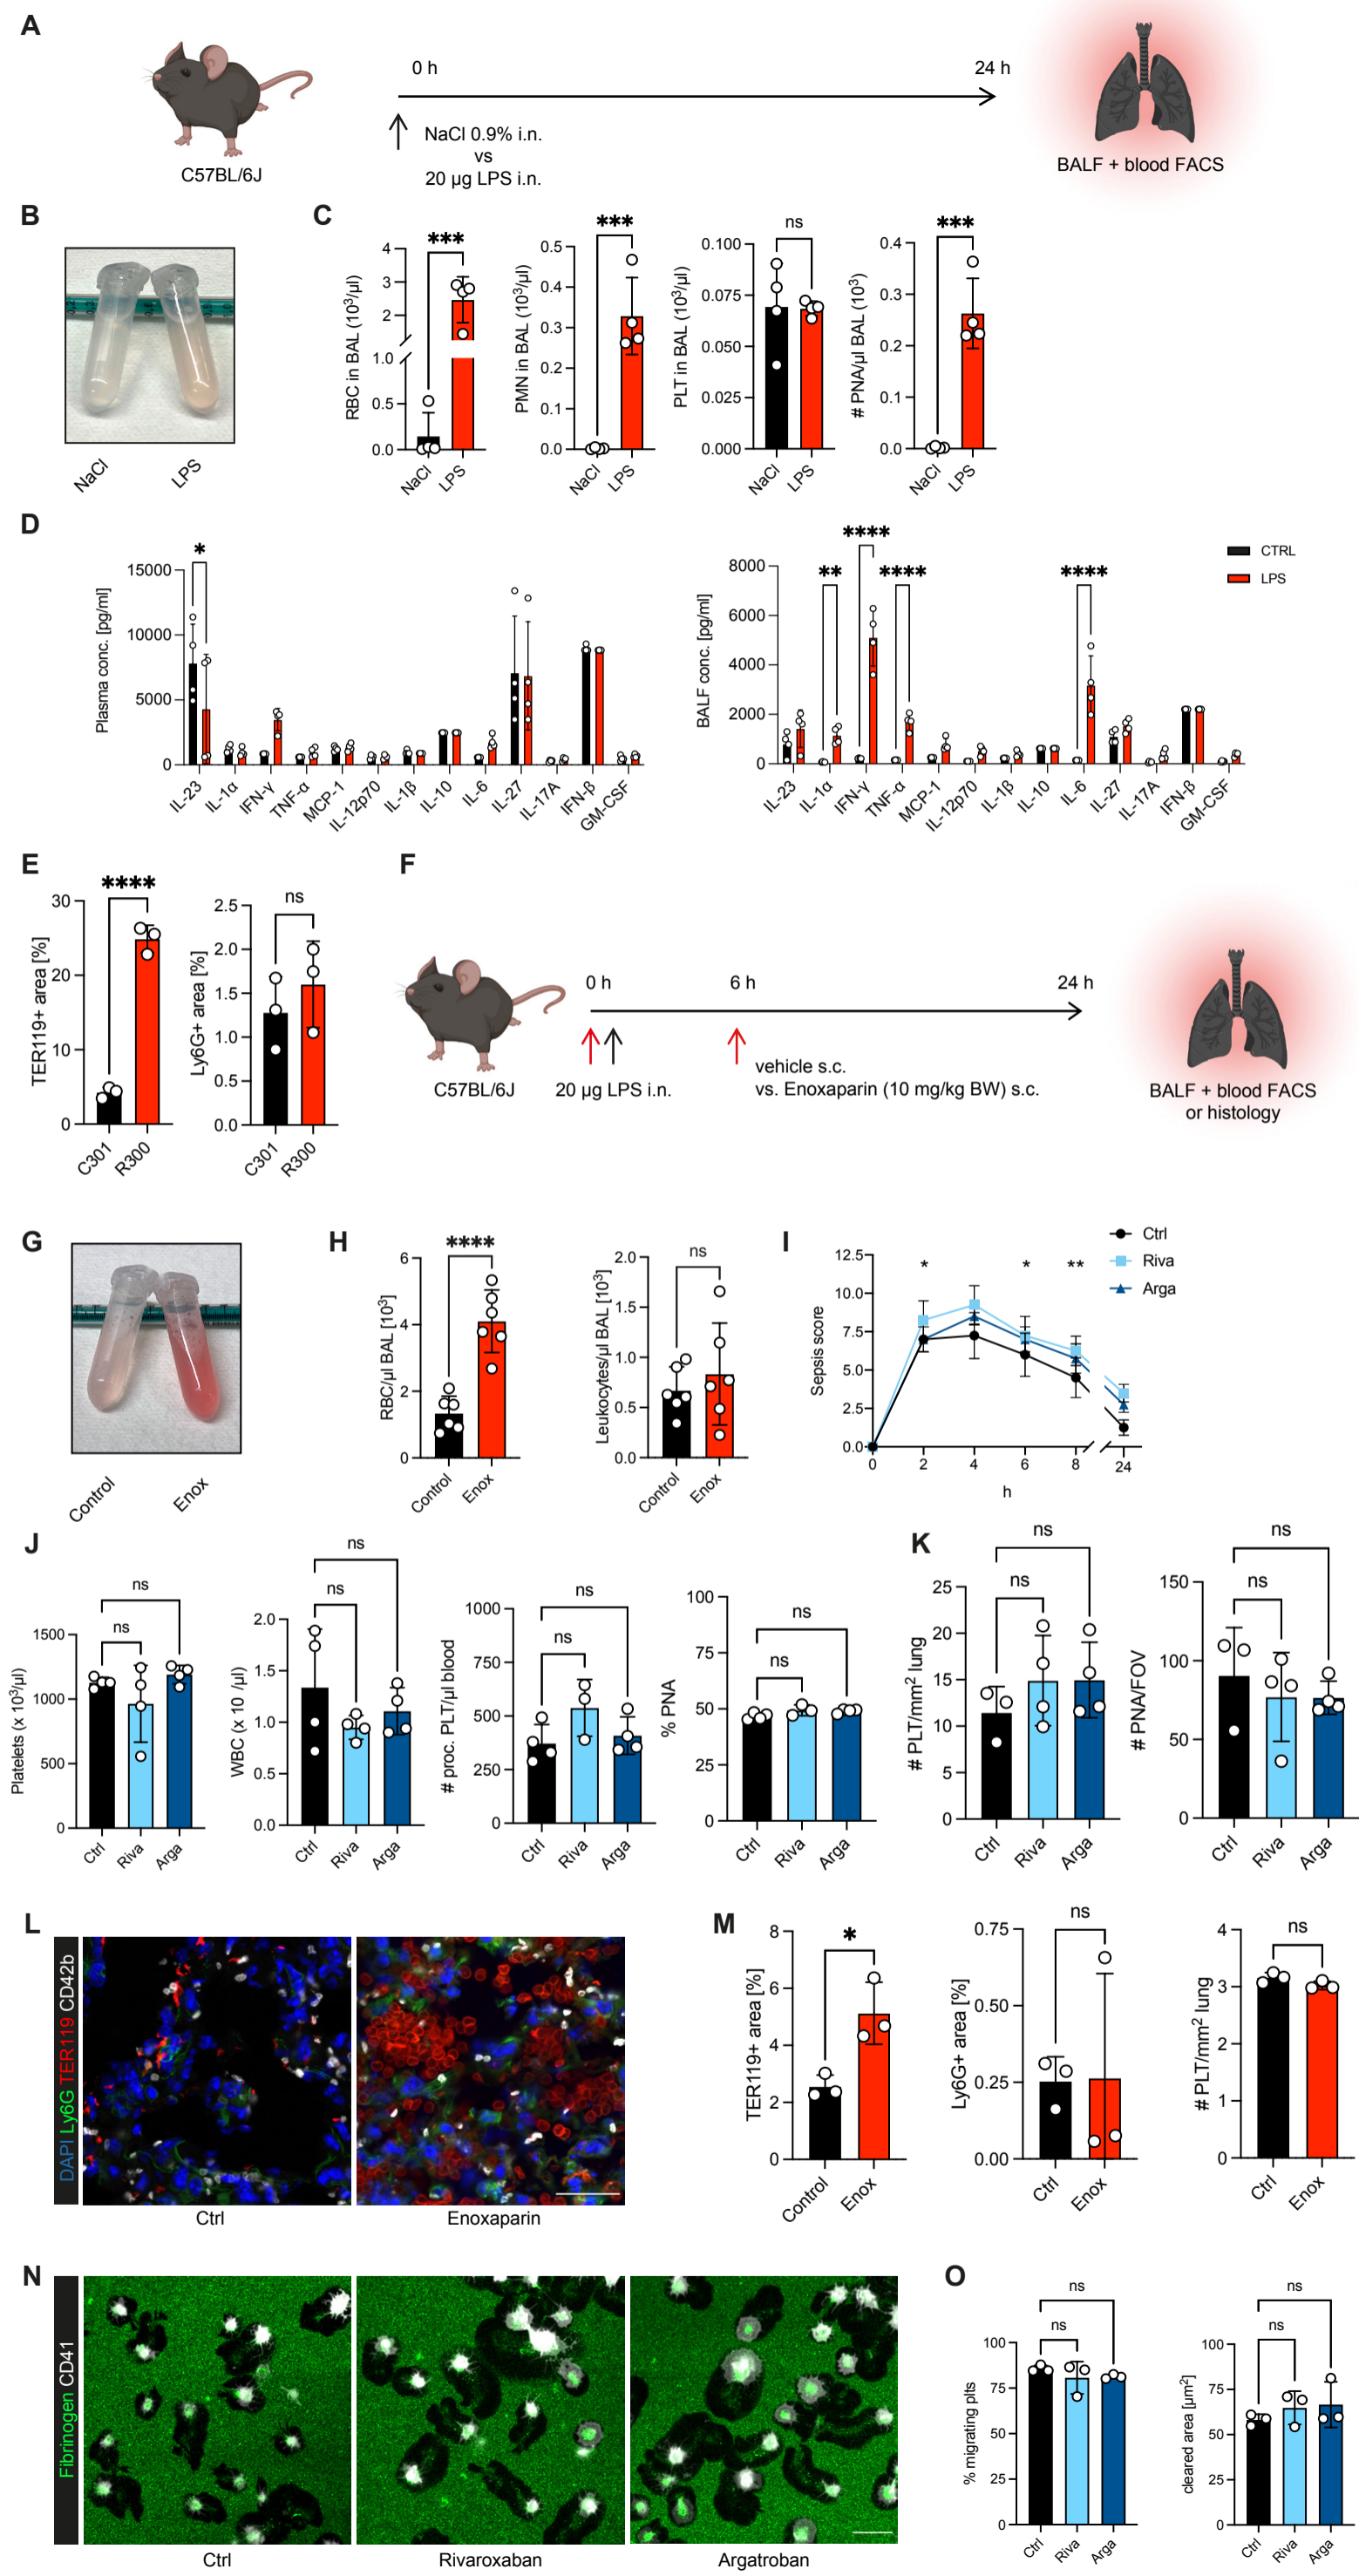

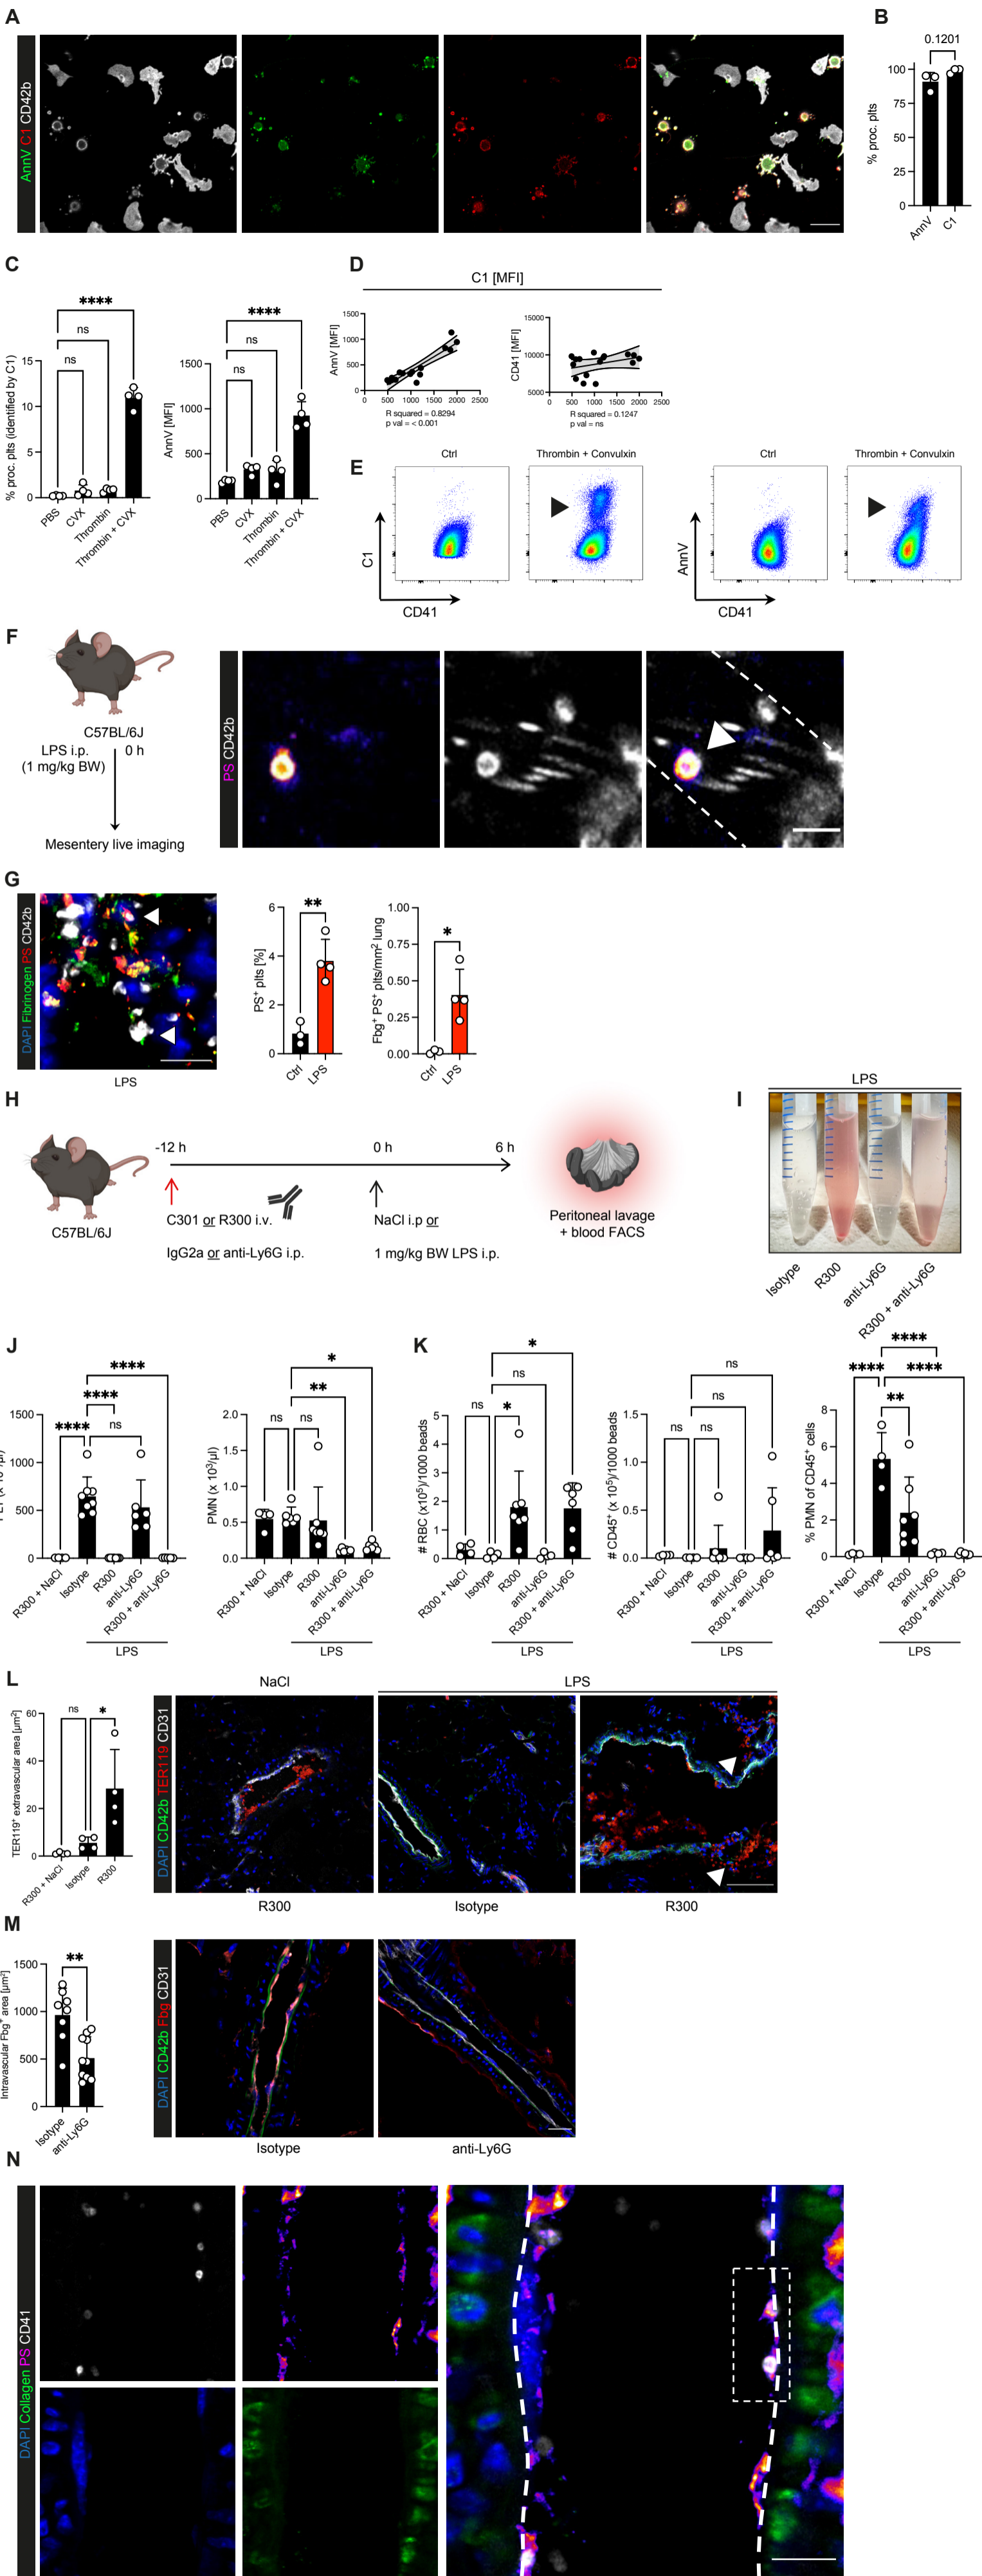

# Suppl. Figure 3: Supporting data migration assay (I)

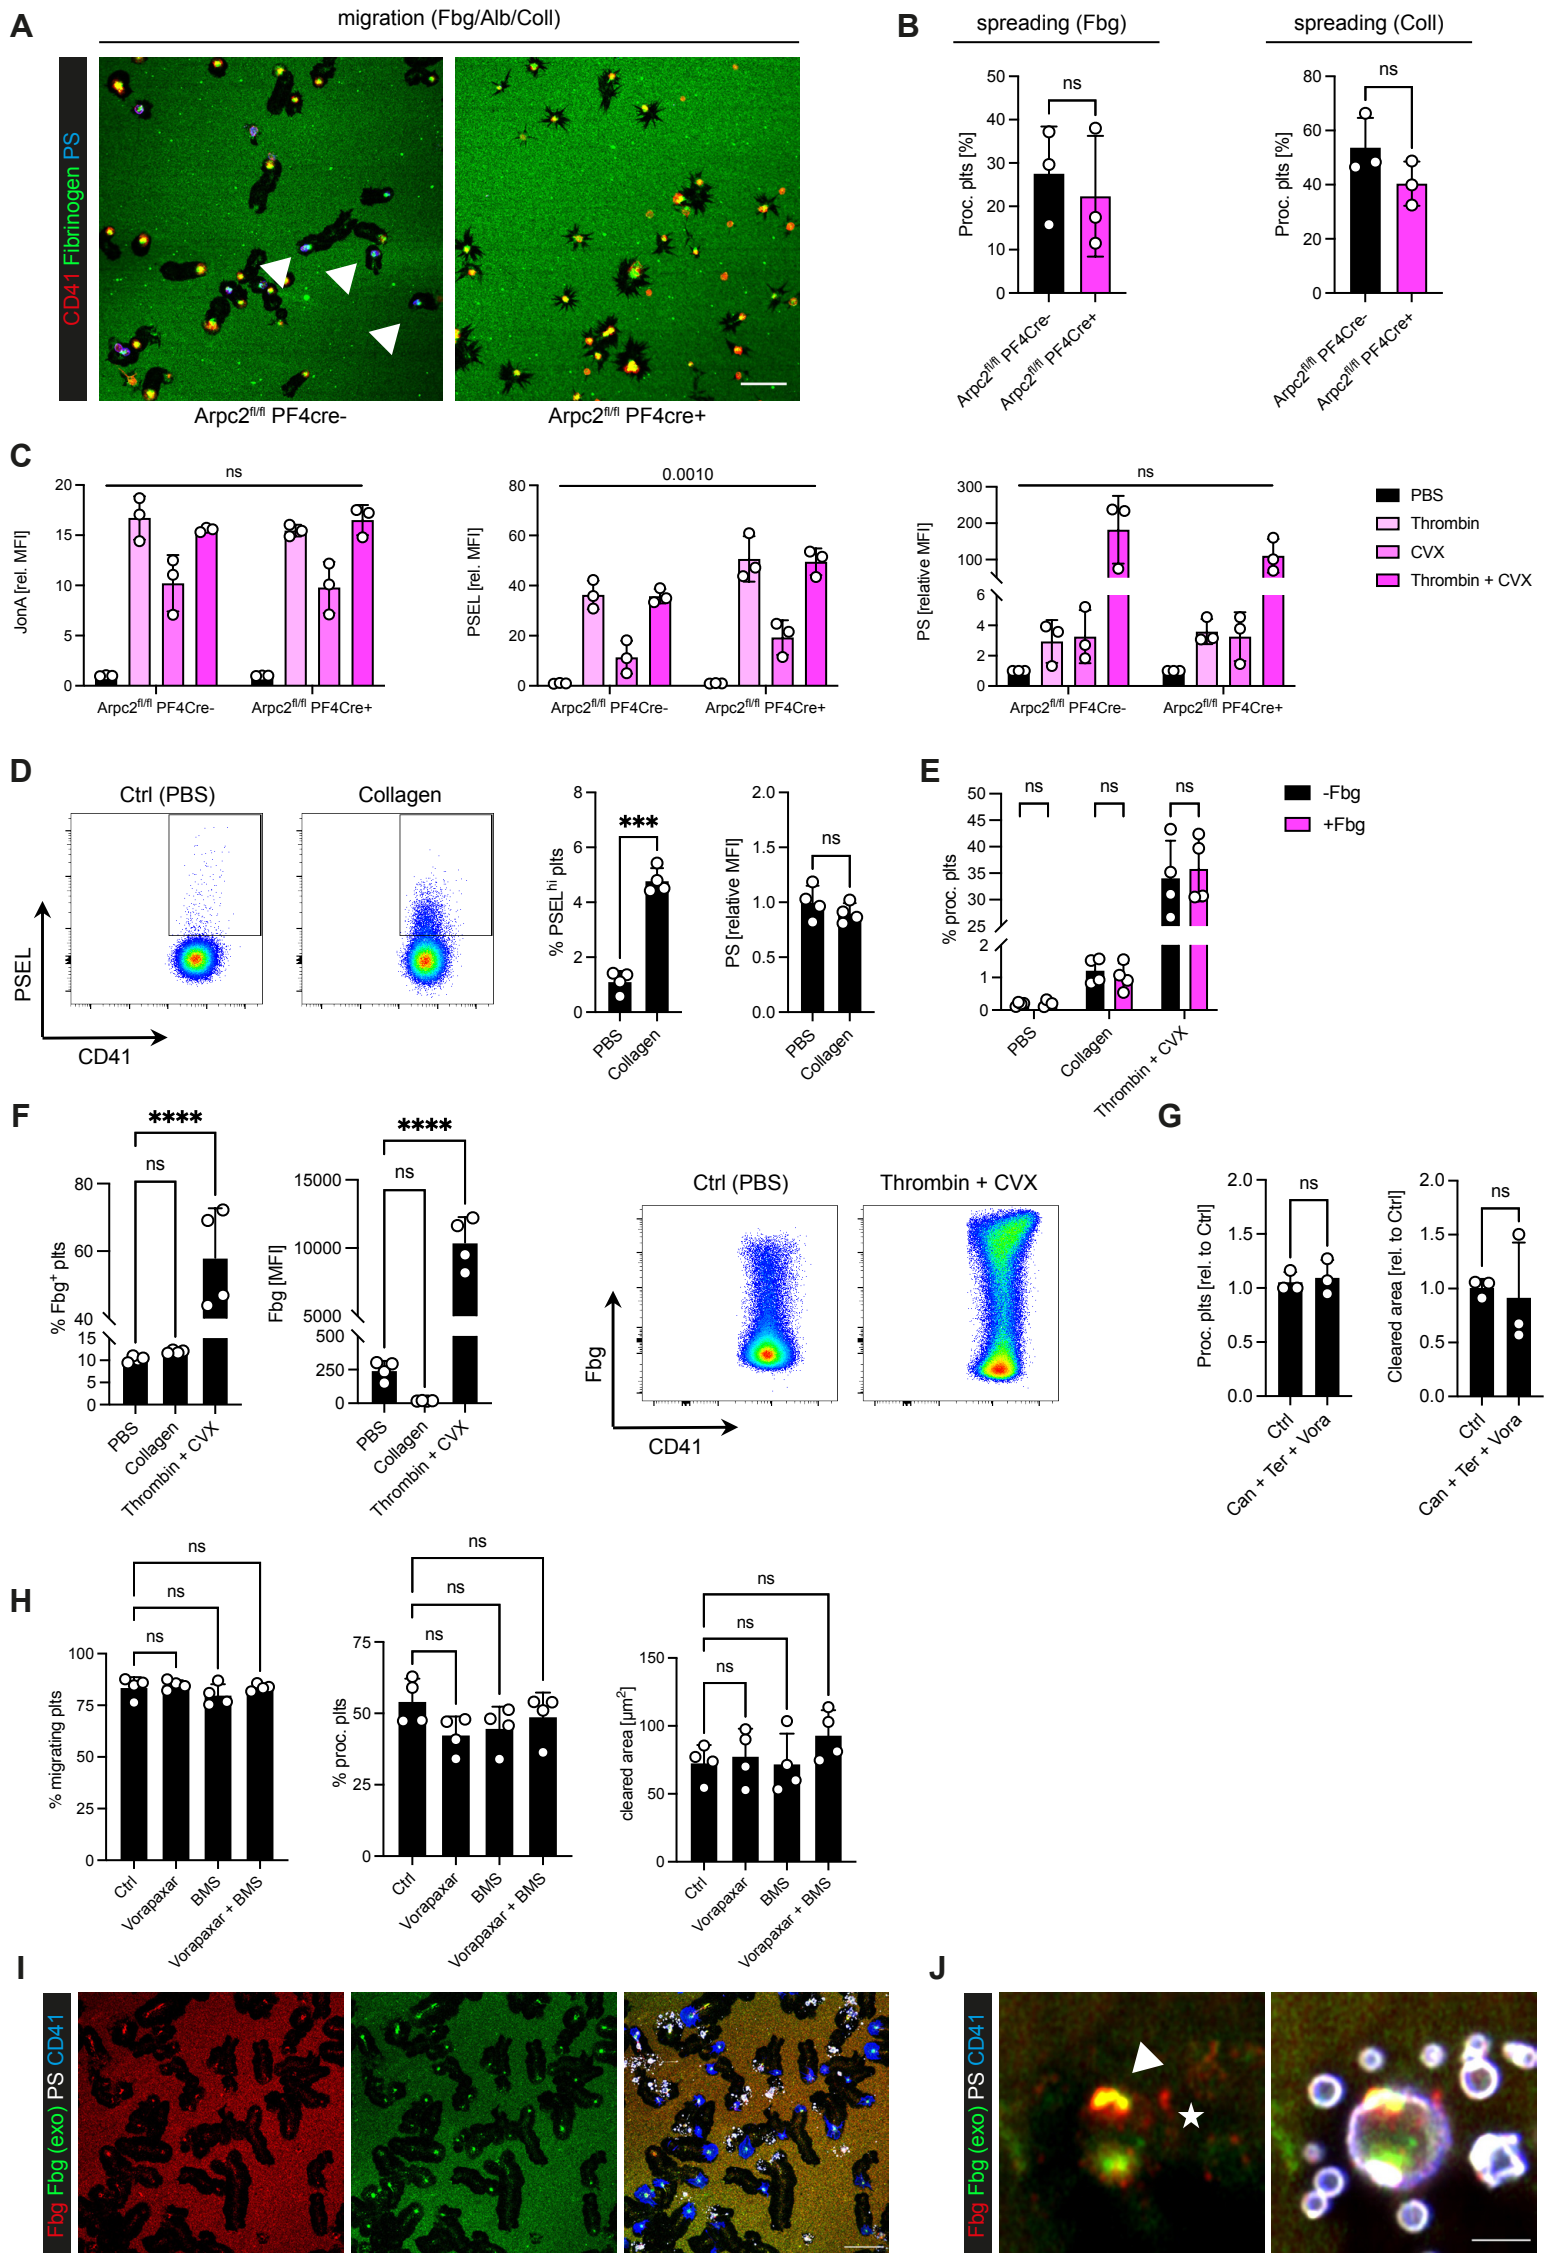

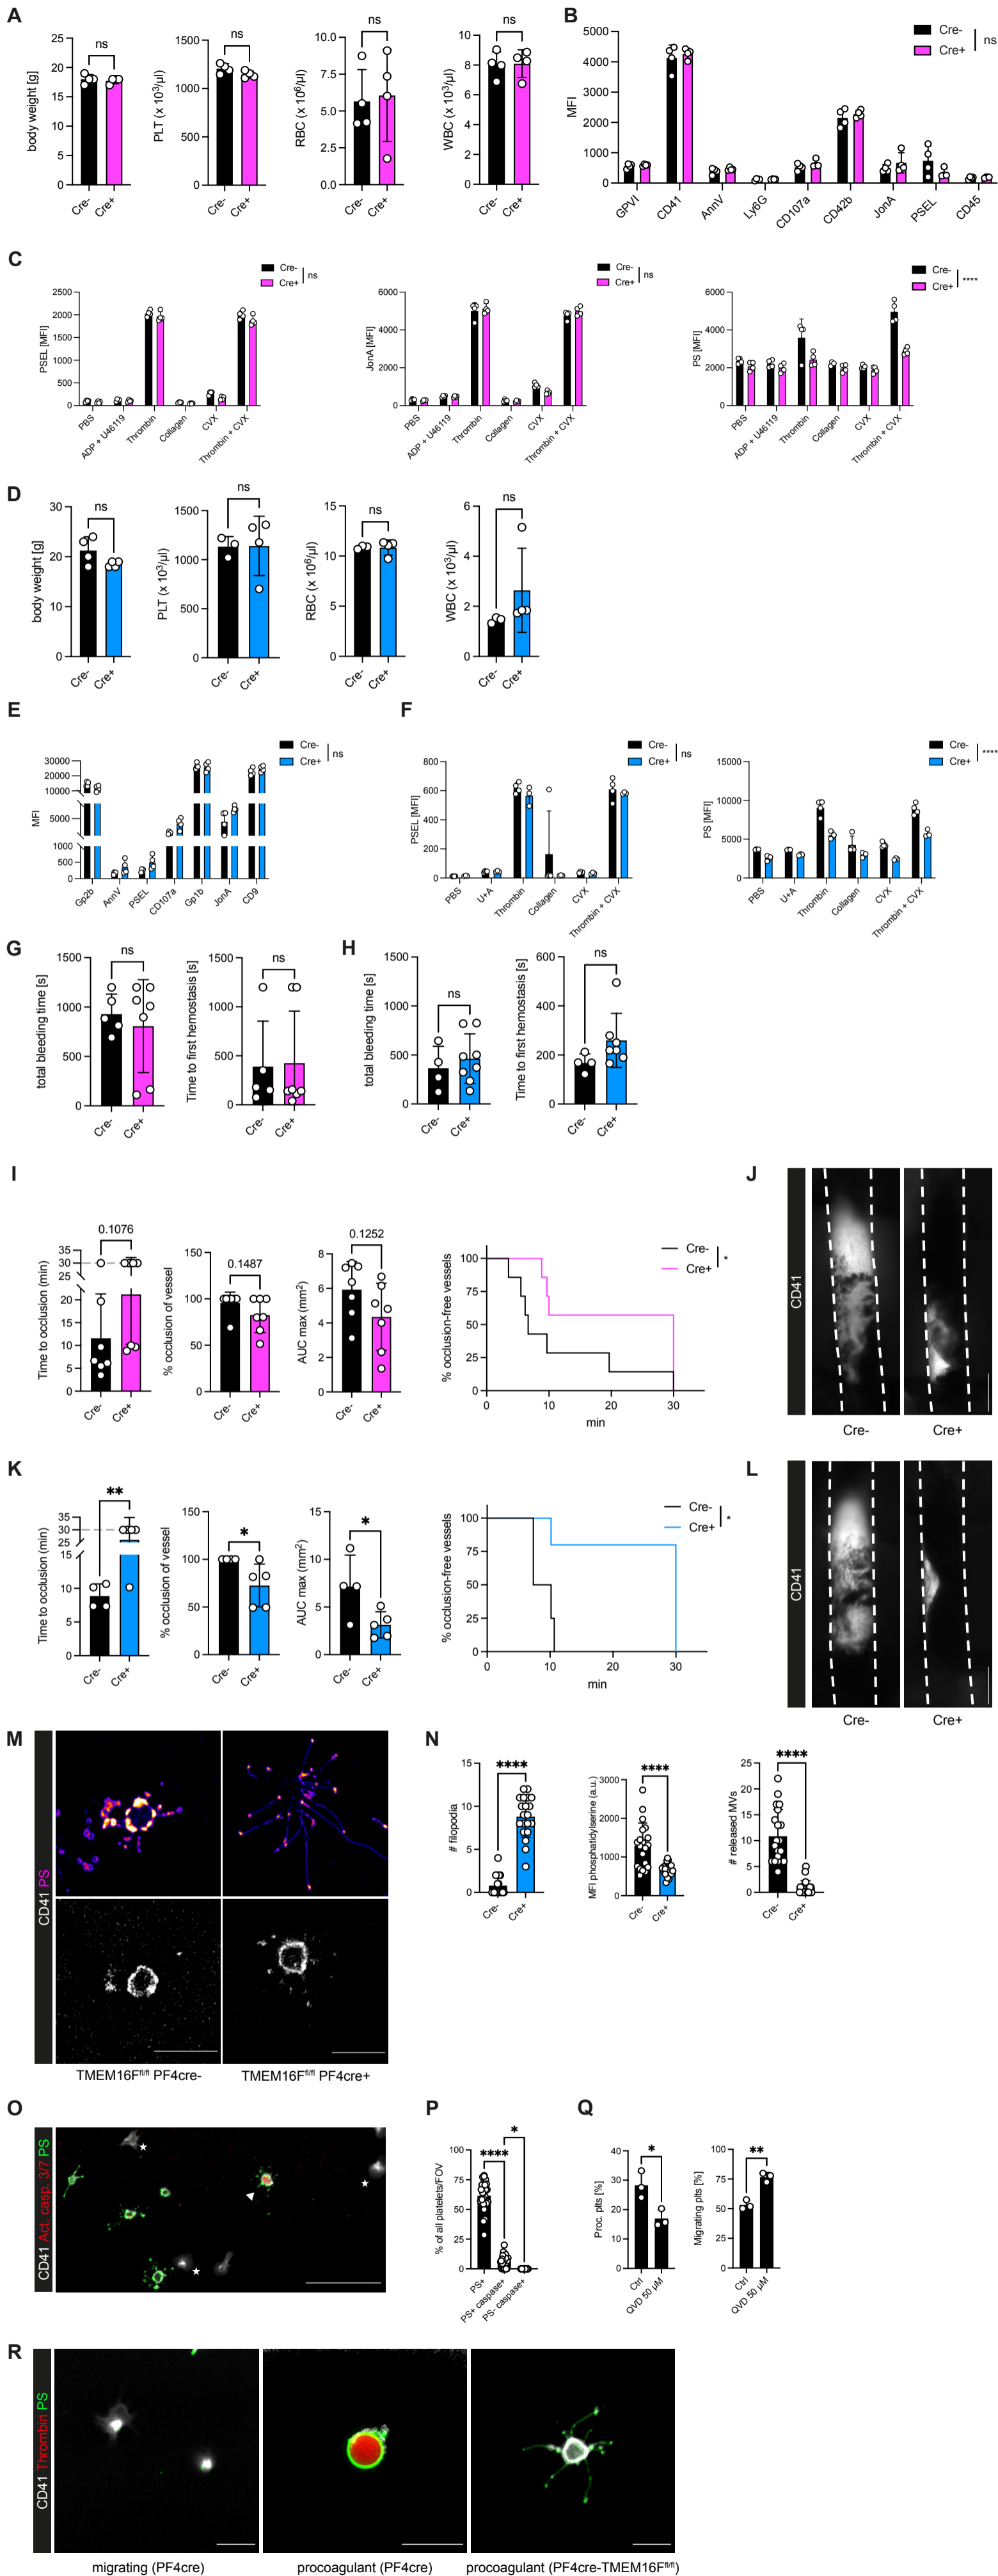



# Suppl. Figure 5: Supporting data CypD/TMEM16F ALI experiment

**A**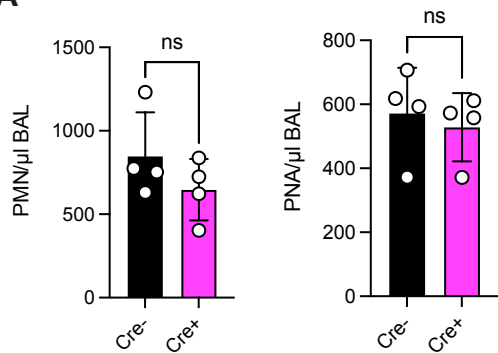**B**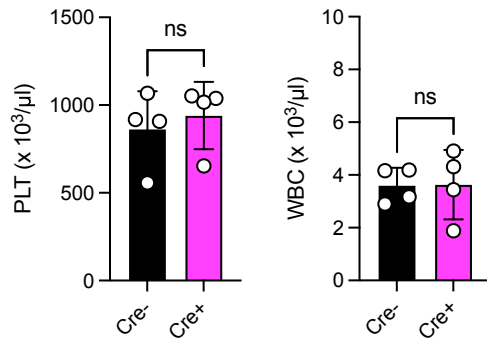**C**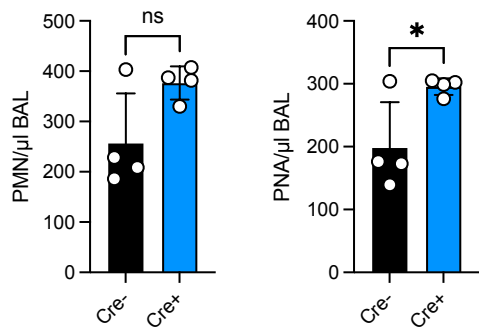**D**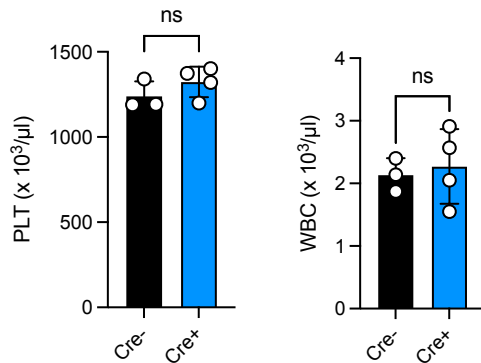

# Suppl. Figure 6: Supporting data mechanosensing and calcium signaling

**A**

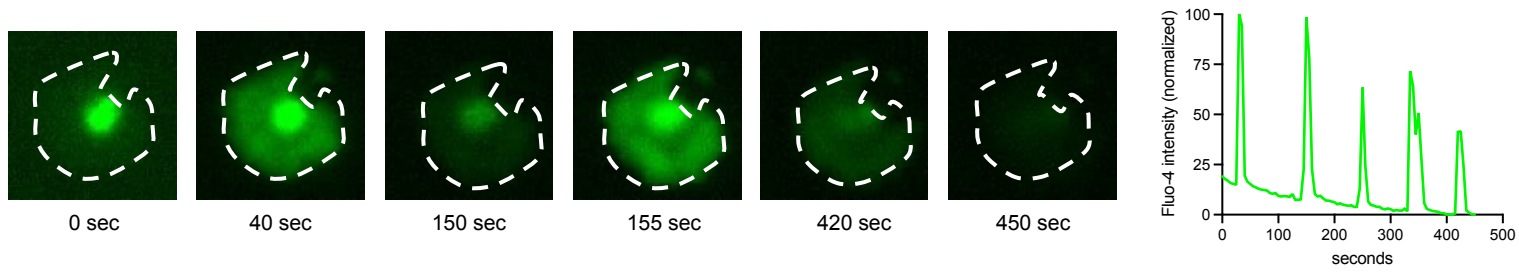

**B**

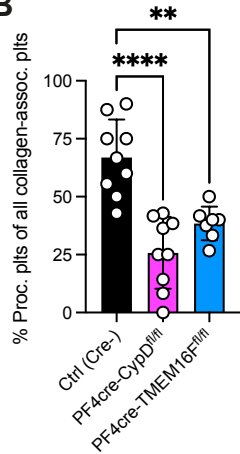

**C**

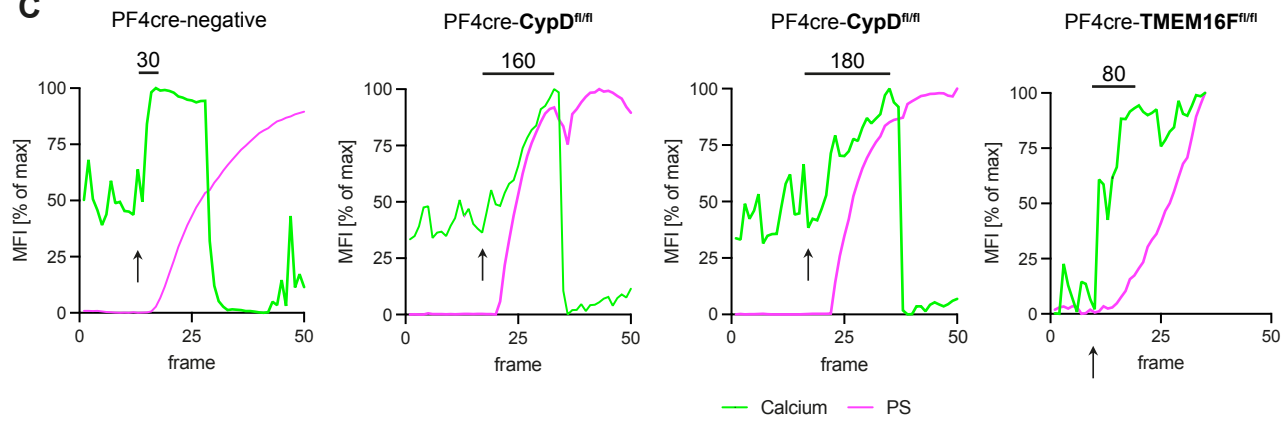

**D**

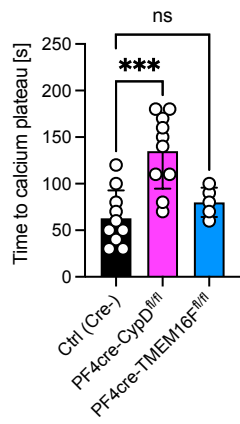

**E**

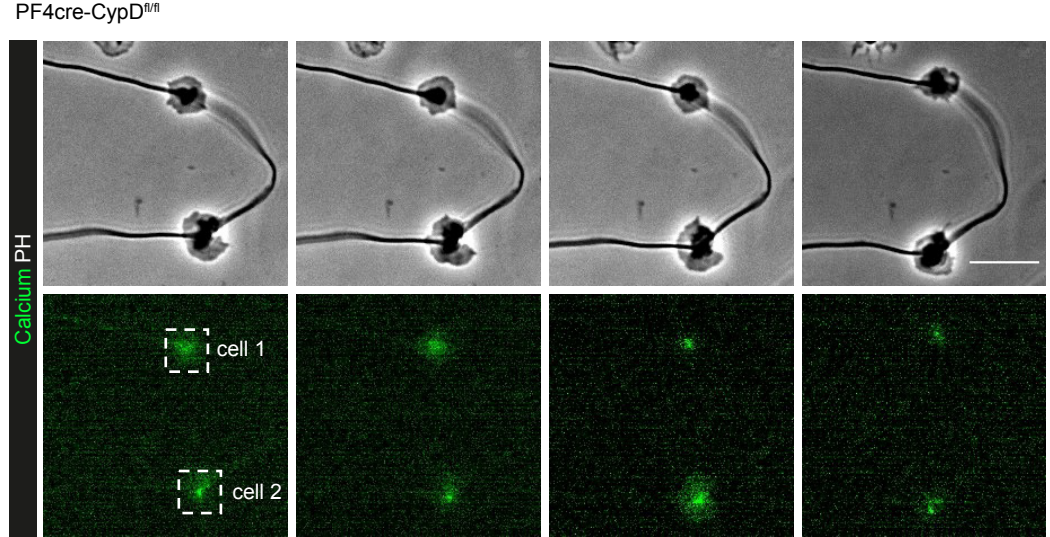

**F**

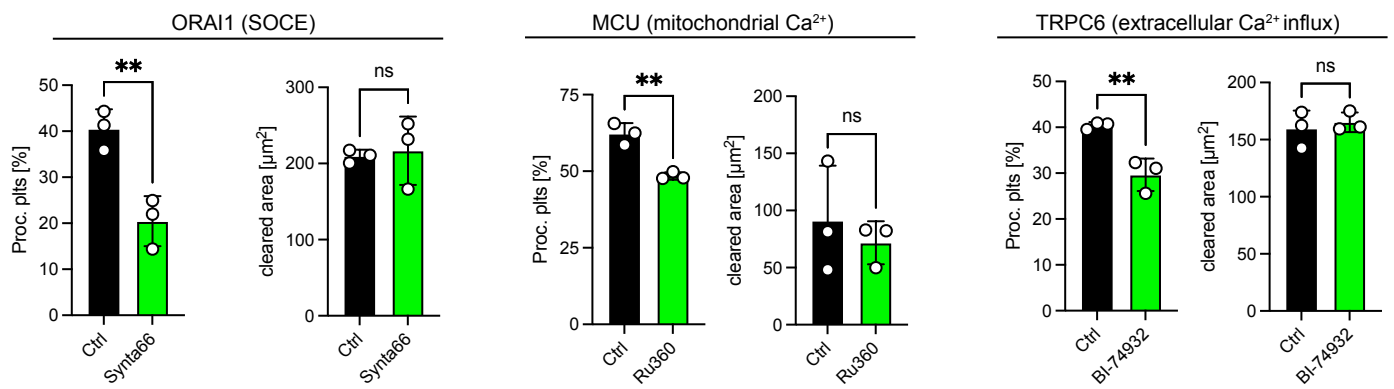

**G**

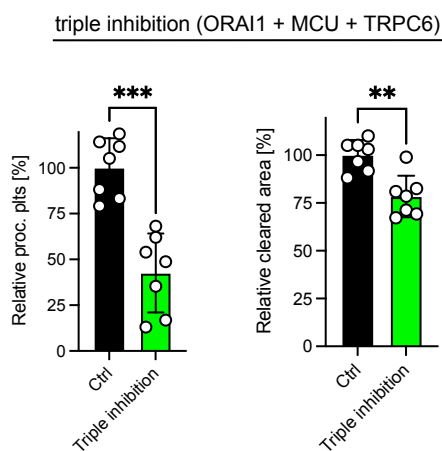

Suppl. Figure 7: Supporting data migration assay (II)

**A**

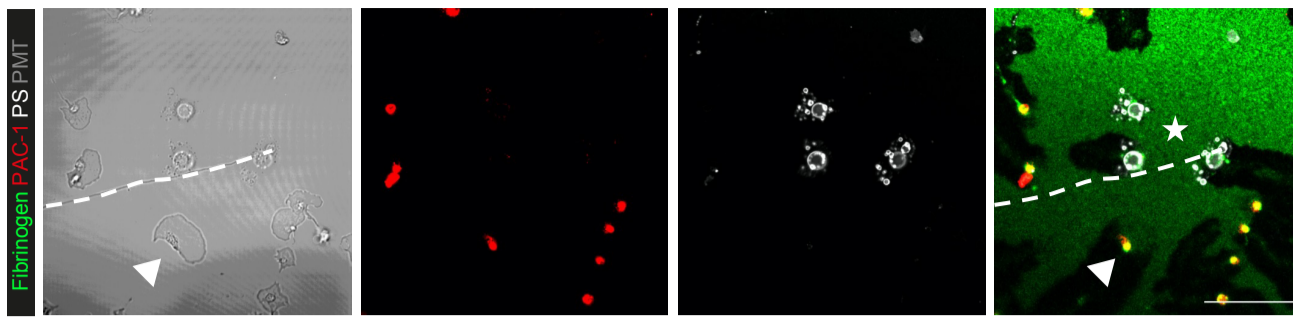

**B**

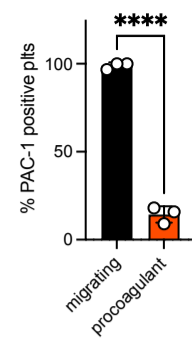

**C**

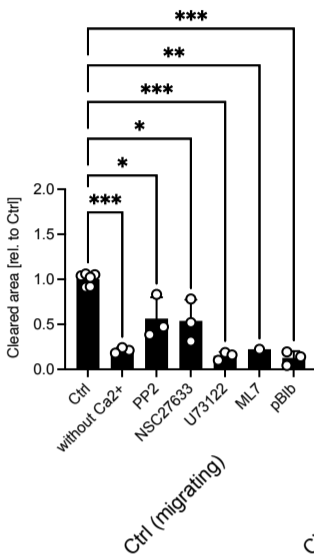

**D**

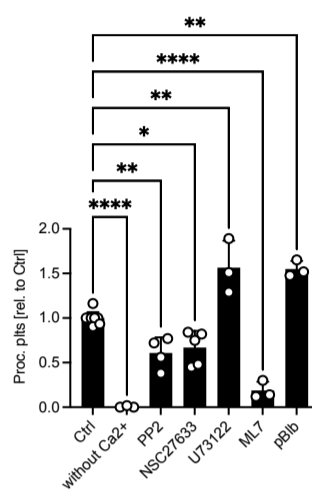

**E**

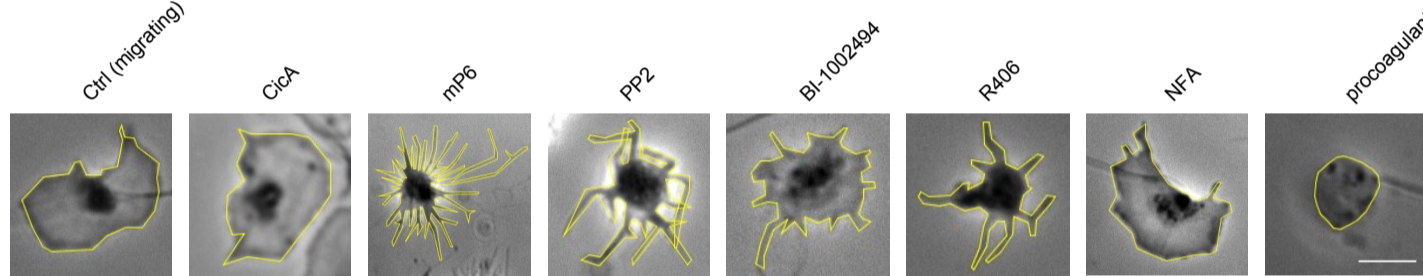

**F**

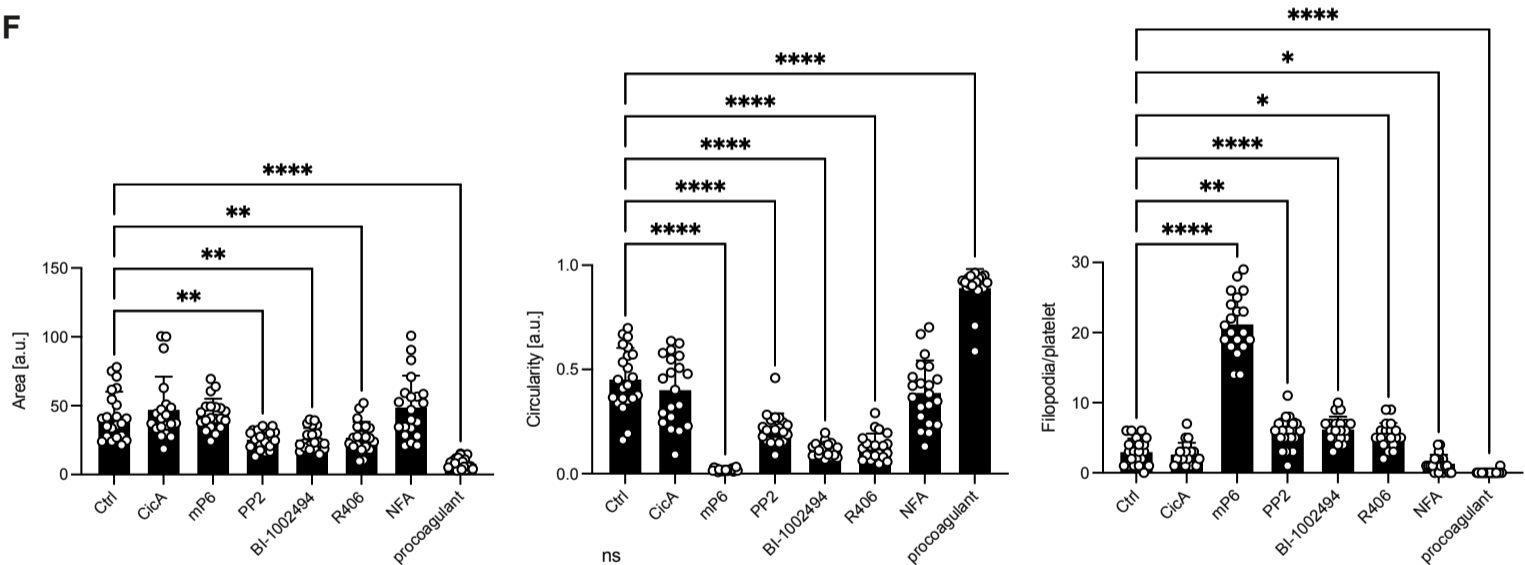

**G**

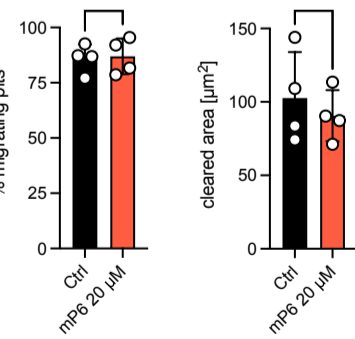

**H**

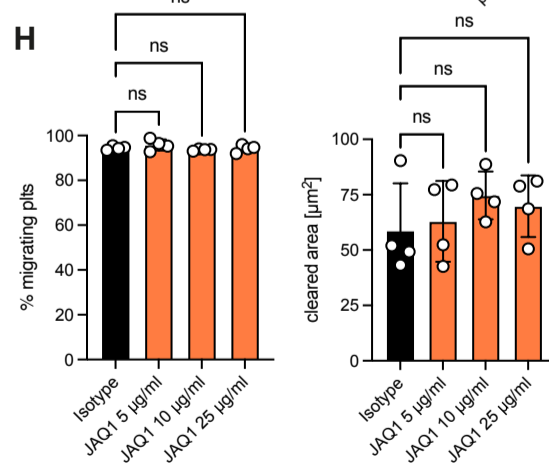

**I**

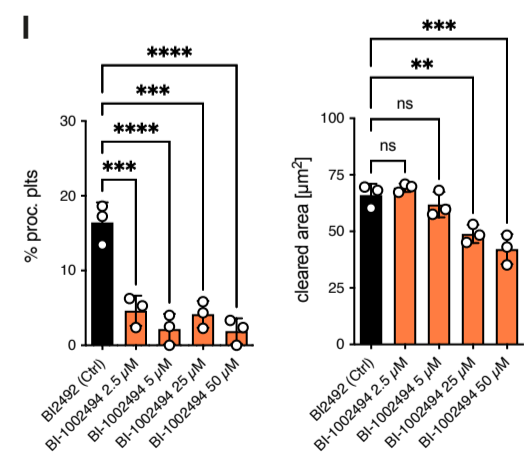

**J**

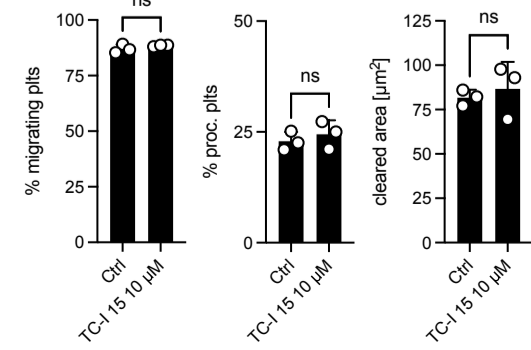

**K**

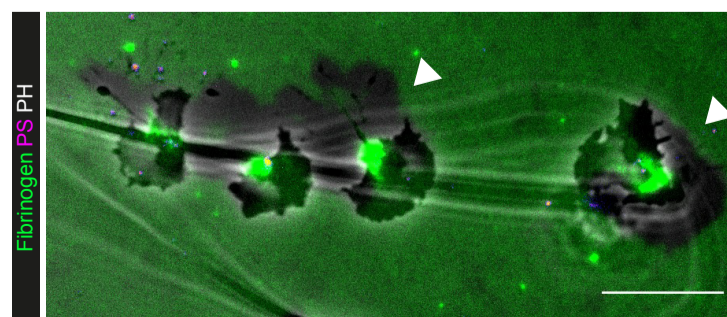

Gα<sub>13</sub> blockade (20 μM mP6)

**L**

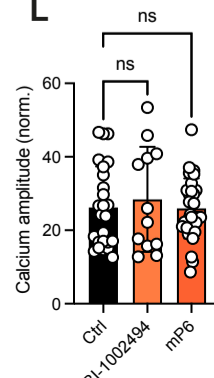

Suppl. Figure 8: Supporting *in vivo* and *in vitro* data for GPIIb/IIIa and GPVI blockade

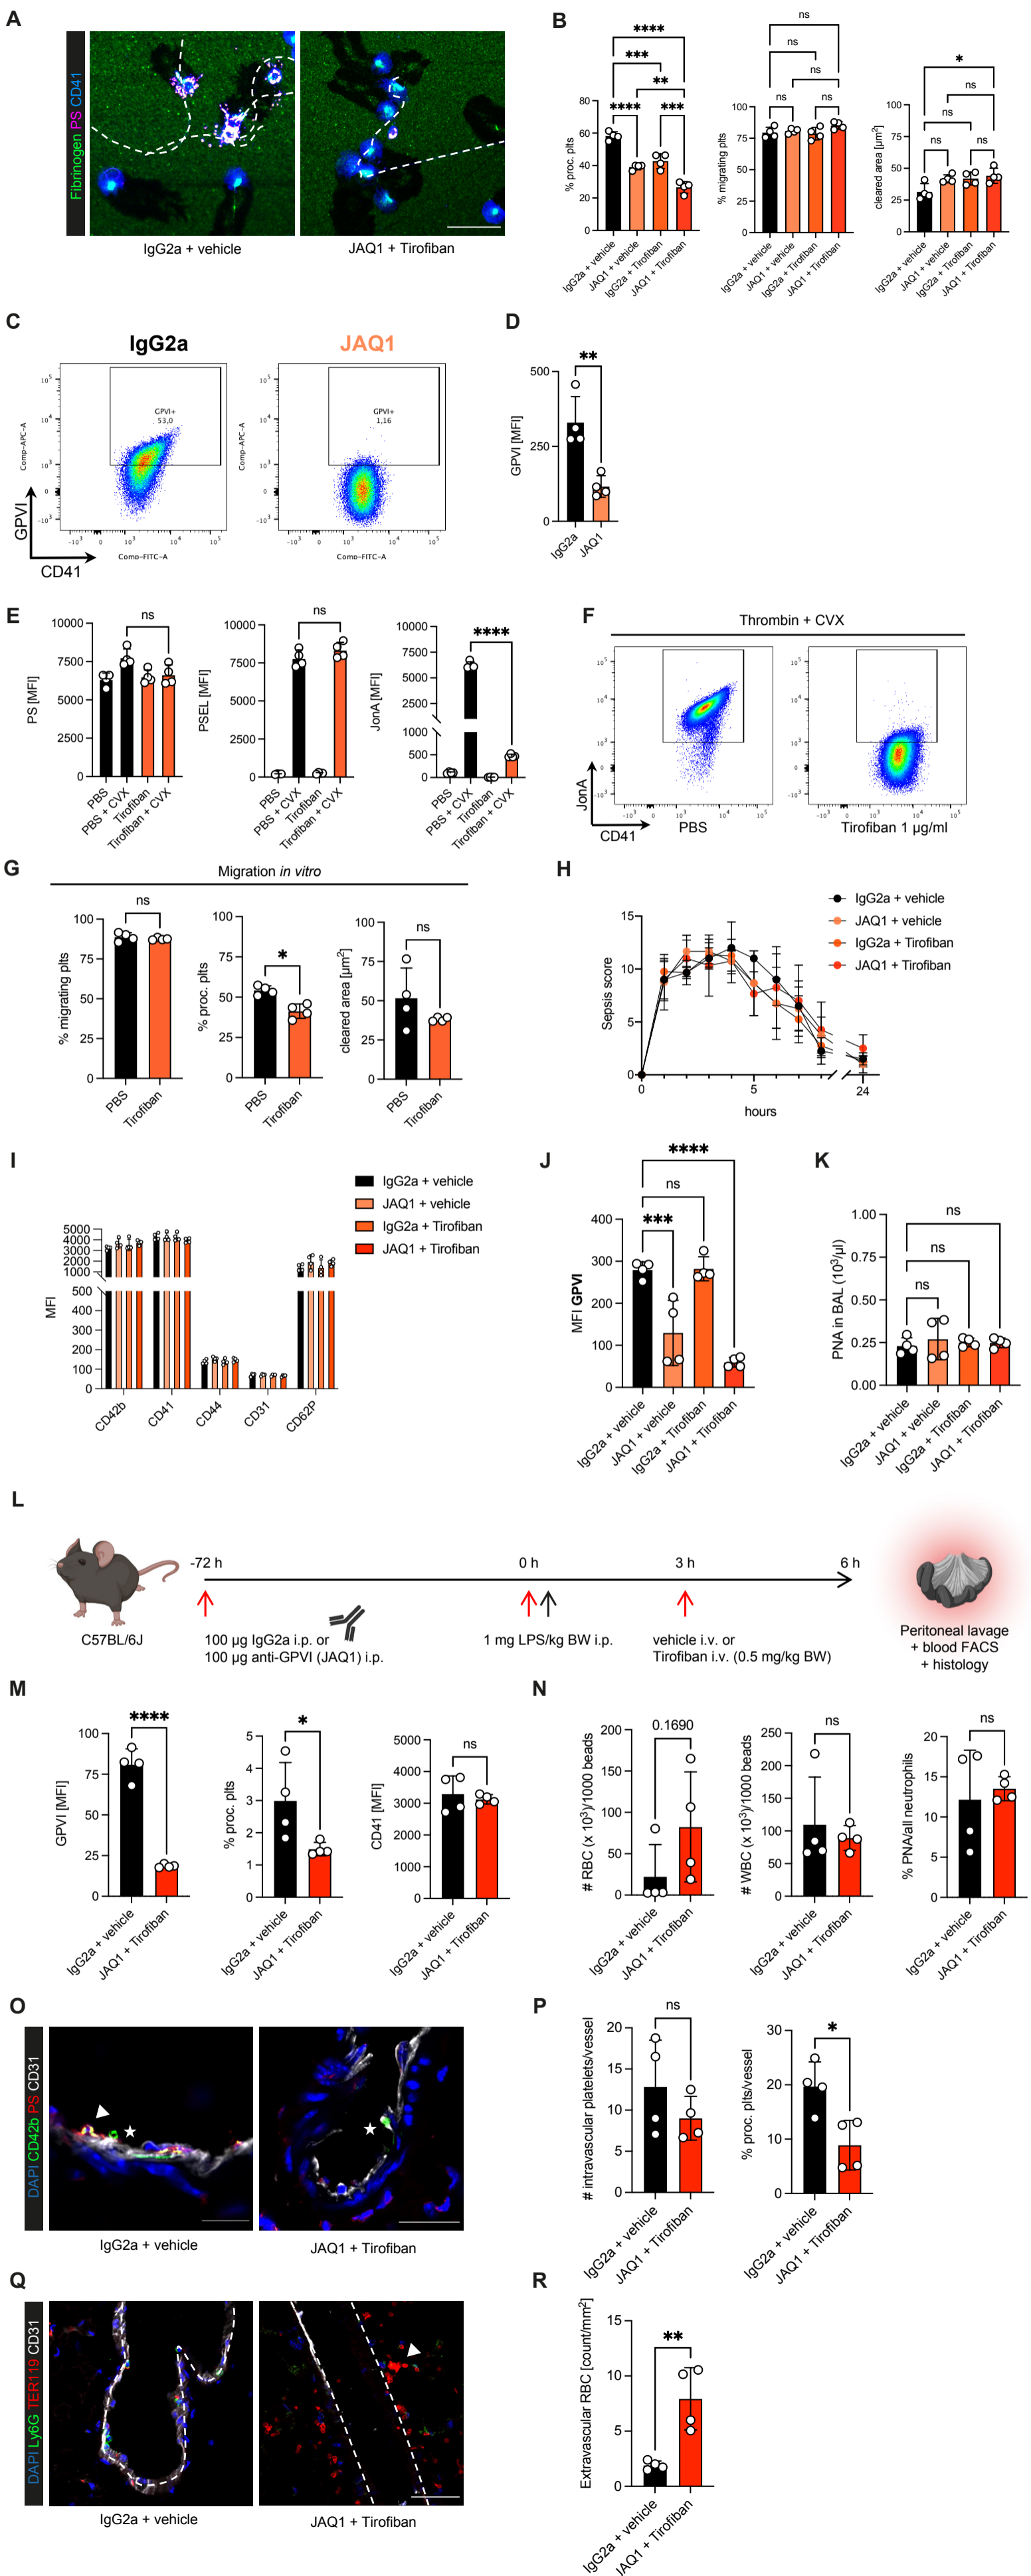

# Suppl. Figure 9: Gating strategies

**A**

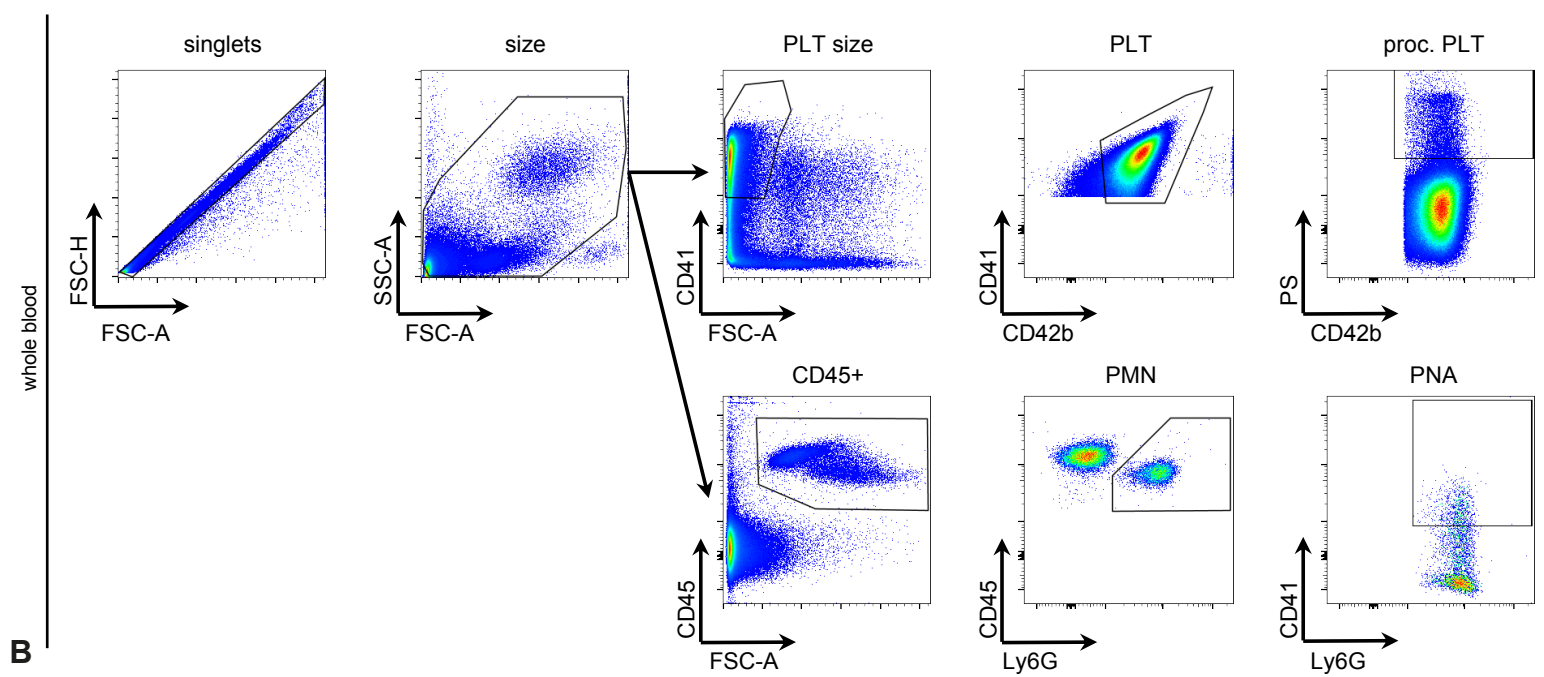

**B**

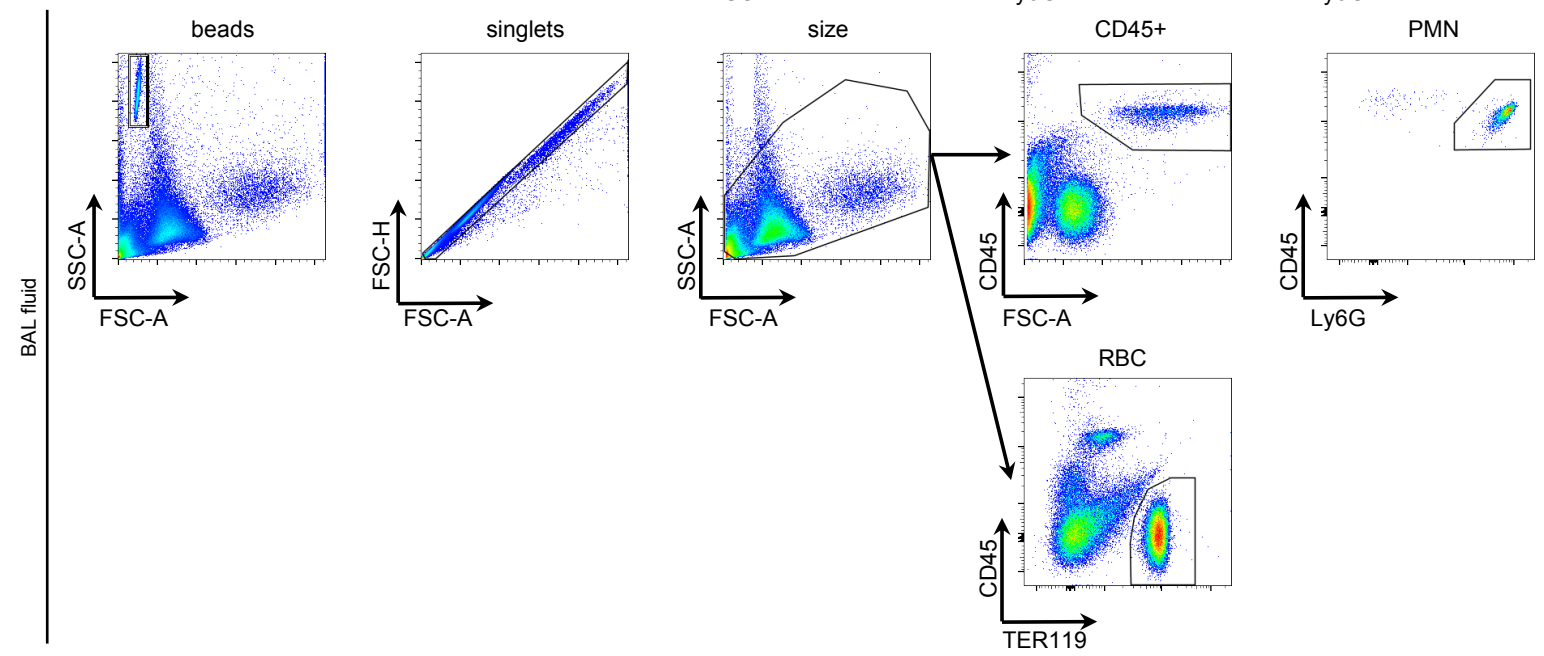

**C**

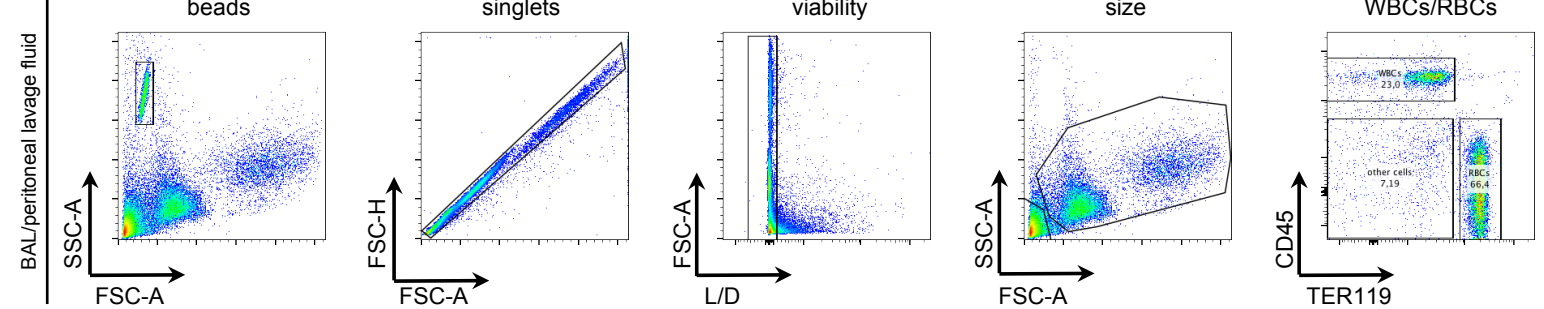

Supplement: bloodBLD2021014914-suppl4.pdf [file bloodBLD2021014914-suppl4.pdf]
